# Supplementary material for: The man, the plant, and the insect: shooting host specificity determinants in Serratia marcescens pangenome
Source: Front Microbiol. 2023 Sep 12;14:1211999. doi: 10.3389/fmicb.2023.1211999 (PMC10656689; doi:10.3389/fmicb.2023.1211999)
Supplement: Supplementary file 2 [file Data_Sheet_2.xlsx]

## Sheet: Tab. S1
Tab. S1. The percentage of BUSCO markers with the ‘Enterobacteriales’ order specified of 73 assemblies of Serratia marcescens used in the study. Accession numbers of the assemblies and the respective percentage are shown.
Assembly	BUSCO_percent
GCF_000336425.1_ASM33642v1	100.0%
GCF_000513215.1_DB11	100.0%
GCF_000783915.2_ASM78391v2	100.0%
GCF_000828775.1_ASM82877v1	100.0%
GCF_001022215.1_ASM102221v1	100.0%
GCF_001280365.1_ASM128036v1	100.0%
GCF_001294565.1_ASM129456v1	100.0%
GCF_001417865.2_ASM141786v2	100.0%
GCF_001672055.1_ASM167205v1	95.2%
GCF_002220515.1_ASM222051v1	100.0%
GCF_002220535.1_ASM222053v1	100.0%
GCF_002220555.1_ASM222055v1	100.0%
GCF_002220575.1_ASM222057v1	100.0%
GCF_002220595.1_ASM222059v1	100.0%
GCF_002220615.1_ASM222061v1	100.0%
GCF_002220635.1_ASM222063v1	99.7%
GCF_002220655.1_ASM222065v1	100.0%
GCF_002220675.1_ASM222067v1	99.7%
GCF_002220695.1_ASM222069v1	100.0%
GCF_002220715.1_ASM222071v1	100.0%
GCF_002947235.1_ASM294723v1	100.0%
GCF_002996885.1_ASM299688v1	100.0%
GCF_002997125.1_ASM299712v1	100.0%
GCF_003031545.1_ASM303154v1	100.0%
GCF_003031645.1_ASM303164v1	100.0%
GCF_003071565.1_ASM307156v1	100.0%
GCF_003071585.1_ASM307158v1	100.0%
GCF_003071605.1_ASM307160v1	100.0%
GCF_003071625.1_ASM307162v1	100.0%
GCF_003146705.1_ASM314670v1	100.0%
GCF_003182655.1_ASM318265v1	99.1%
GCF_003186475.1_ASM318647v1	100.0%
GCF_003204075.1_ASM320407v1	100.0%
GCF_003204405.1_ASM320440v1	100.0%
GCF_003355135.1_ASM335513v1	100.0%
GCF_003967055.1_ASM396705v1	100.0%
GCF_006711125.1_ASM671112v1	100.0%
GCF_006711145.1_ASM671114v1	95.0%
GCF_006711245.1_ASM671124v1	100.0%
GCF_006711405.1_ASM671140v1	100.0%
GCF_006711525.1_ASM671152v1	95.1%
GCF_006716725.1_ASM671672v1	100.0%
GCF_006716825.1_ASM671682v1	100.0%
GCF_006842785.1_ASM684278v1	100.0%
GCF_006974205.1_ASM697420v1	95.2%
GCF_008364265.2_ASM836426v2	99.5%
GCF_008931425.1_ASM893142v1	100.0%
GCF_009834305.1_ASM983430v1	100.0%
GCF_009858195.1_ASM985819v1	100.0%
GCF_009909345.1_ASM990934v1	100.0%
GCF_009909365.1_ASM990936v1	100.0%
GCF_009909385.1_ASM990938v1	100.0%
GCF_009909405.1_ASM990940v1	100.0%
GCF_009909425.1_ASM990942v1	100.0%
GCF_009936295.1_ASM993629v1	100.0%
GCF_011602465.1_ASM1160246v1	100.0%
GCF_011769885.1_ASM1176988v1	100.0%
GCF_013112395.1_ASM1311239v1	100.0%
GCF_013122155.1_ASM1312215v1	100.0%
GCF_013367735.1_ASM1336773v1	100.0%
GCF_013377375.1_ASM1337737v1	100.0%
GCF_013426135.1_ASM1342613v1	100.0%
GCF_013426155.1_ASM1342615v1	100.0%
GCF_015074945.1_ASM1507494v1	100.0%
GCF_015160915.1_ASM1516091v1	100.0%
GCF_015708655.1_ASM1570865v1	100.0%
GCF_017299175.1_ASM1729917v1	100.0%
GCF_017299435.1_ASM1729943v1	100.0%
GCF_017301275.1_ASM1730127v1	100.0%
GCF_017654245.1_ASM1765424v1	100.0%
GCF_019344315.1_ASM1934431v1	100.0%
GCF_900029885.1_Sm_SMB2099	99.3%
GCF_904866365.1_MSB1_9C	100.0%

## Sheet: Tab. S2
Tab. S2. Properties of the genomic dataset. Accession of assemblies, strain, number of chromosomes and contigs, L50, N50, total genome length, GC content, number of CDS (coding DNA sequences), the mean size of CDS in amino acids, and the abundance of hypothetical proteins are presented.
Assembly	Strain	Chromosomes	Contigs	L50	N50	Total_length	GC_content	CDS_num	Mean_CDS_size	Num_hypothetical
GCF_000336425.1	WW4	1	2	1	5241455	5244703	0.595471	4860	313.894	353
GCF_000513215.1	Db11	1	1	1	5113802	5113802	0.595116	4689	317.242	276
GCF_000783915.2	FDAARGOS_65	1	1	1	5248423	5248423	0.598783	4768	319.384	338
GCF_000828775.1	SM39	1	3	1	5225577	5326023	0.597424	4919	313.287	396
GCF_001022215.1	CAV1492	1	6	1	5477084	5828402	0.586126	5336	310.119	553
GCF_001280365.1	RSC-14	1	1	1	5127030	5127030	0.596134	4696	314.932	324
GCF_001294565.1	SmUNAM836	1	2	1	5207023	5233369	0.597956	4868	311.458	409
GCF_001417865.2	B3R3	1	2	1	5471721	5594892	0.590673	5165	312.731	454
GCF_001672055.1	U36365	1	1	1	5125866	5125866	0.597378	4351	306.458	309
GCF_002220515.1	UMH2	1	1	1	5308626	5308626	0.59391	4873	313.822	349
GCF_002220535.1	UMH8	1	1	1	5155137	5155137	0.596252	4774	314.315	352
GCF_002220555.1	UMH9	1	1	1	5024591	5024591	0.601605	4571	318.679	269
GCF_002220575.1	UMH11	1	1	1	5221717	5221717	0.593391	4771	318.478	288
GCF_002220595.1	UMH12	1	1	1	5196805	5196805	0.593331	4776	315.938	330
GCF_002220615.1	UMH1	1	2	1	5056149	5129681	0.594534	4688	318.356	259
GCF_002220635.1	UMH5	1	2	1	5357156	5457855	0.594987	5077	310.381	394
GCF_002220655.1	UMH3	1	1	1	5300955	5300955	0.596967	4933	312.906	432
GCF_002220675.1	UMH6	1	1	1	5192910	5192910	0.595242	4789	313.041	378
GCF_002220695.1	UMH10	1	1	1	5221713	5221713	0.593391	4772	318.373	291
GCF_002220715.1	UMH7	1	4	1	5182841	5363653	0.59242	4994	310.012	384
GCF_002947235.1	AR_0027	1	2	1	5472946	5495515	0.596523	5041	314.606	391
GCF_002996885.1	AR_0091	1	1	1	5309542	5309542	0.596744	4921	312.889	377
GCF_002997125.1	AR_0099	1	1	1	5284831	5284831	0.597474	4882	314.889	364
GCF_003031545.1	95	1	4	1	5356402	5638258	0.585625	5053	311.518	444
GCF_003031645.1	BWH-35	1	2	1	5289724	5513932	0.587393	4947	312.711	412
GCF_003071565.1	AR_0124	1	1	1	5180277	5180277	0.598755	4758	316.706	329
GCF_003071585.1	AR_0130	1	1	1	5138817	5138817	0.594844	4744	313.899	334
GCF_003071605.1	AR_0123	1	1	1	5140937	5140937	0.599404	4706	317.67	281
GCF_003071625.1	AR_0121	1	1	1	5140918	5140918	0.599403	4705	317.752	279
GCF_003146705.1	CAV1761	1	6	1	5540160	5896859	0.584741	5364	309.081	574
GCF_003182655.1	SGAir0764	1	2	1	5142714	5219198	0.594567	4751	309.73	364
GCF_003186475.1	332	1	1	1	5059456	5059456	0.593945	4738	311.156	368
GCF_003204075.1	AR_0131	1	1	1	5140937	5140937	0.599404	4706	317.72	281
GCF_003204405.1	AR_0122	1	1	1	5140912	5140912	0.599402	4705	317.767	280
GCF_003355135.1	N4-5	1	2	1	5074473	5085562	0.596657	4703	313.953	296
GCF_003967055.1	AS-1	1	2	1	5071908	5176029	0.595433	4747	314.189	345
GCF_006711125.1	WVU-004	1	1	1	5307451	5307451	0.59654	4916	313.758	355
GCF_006711145.1	WVU-005	1	3	1	5366294	5520811	0.5905	4743	303.424	479
GCF_006711245.1	WVU-006	1	1	1	5233072	5233072	0.595369	4799	315.707	335
GCF_006711405.1	WVU-007	1	1	1	5325027	5325027	0.596482	4940	313.585	354
GCF_006711525.1	WVU-008	1	1	1	5271698	5271698	0.597193	4519	304.18	360
GCF_006716725.1	WVU-009	1	2	1	5309876	5387143	0.594242	4960	312.861	364
GCF_006716825.1	WVU-010	1	1	1	5324996	5324996	0.596481	4938	313.611	353
GCF_006842785.1	WVU-002	1	1	1	5307415	5307415	0.59654	4916	313.686	356
GCF_006974205.1	ATCC 13880	1	2	1	5115562	5158713	0.597878	3991	297.003	354
GCF_008364265.2	S7.1	1	1	1	5088187	5088187	0.596385	4620	312.768	308
GCF_008931425.1	E28	1	5	1	5419694	5763442	0.5872	5267	308.156	588
GCF_009834305.1	N10A28	1	1	1	5276341	5276341	0.598163	4826	316.791	341
GCF_009858195.1	1602	1	2	1	5122776	5165500	0.598742	4714	317.507	318
GCF_009909345.1	4201	1	3	1	5331789	5428798	0.59319	5041	311.094	416
GCF_009909365.1	3024	1	3	1	5428813	5534941	0.596118	5073	313.858	448
GCF_009909385.1	1140-	1	3	1	5429004	5535124	0.596118	5070	313.886	447
GCF_009909405.1	2838	1	3	1	5416416	5522536	0.596301	5062	313.934	448
GCF_009909425.1	C110	1	3	1	5427741	5533861	0.596141	5072	313.946	448
GCF_009936295.1	ATCC 274	1	1	1	5148533	5148533	0.595231	4678	316.084	279
GCF_011602465.1	BP2	1	1	1	5088390	5088390	0.597595	4692	316.212	273
GCF_011769885.1	SER00094	1	1	1	5217372	5217372	0.594709	4777	317.901	298
GCF_013112395.1	FZSF02	1	1	1	5407775	5407775	0.590649	4984	311.849	413
GCF_013122155.1	FY	1	3	1	5074453	5263176	0.595033	4838	316.813	324
GCF_013367735.1	JW-CZ2	1	1	1	4925622	4925622	0.598188	4529	316.545	269
GCF_013377375.1	1912768R	1	1	1	5117289	5117289	0.597541	4733	315.262	299
GCF_013426135.1	12/2010	1	1	1	5642069	5642069	0.593897	5208	310.55	484
GCF_013426155.1	11/2010	1	2	1	5352713	5492570	0.593899	5102	311.163	420
GCF_015074945.1	SCH909	1	2	1	5315598	5399348	0.597925	4981	313.743	423
GCF_015160915.1	SCQ1	1	2	1	4994354	5063945	0.596545	4701	313.899	321
GCF_015708655.1	Byron	1	1	1	5158598	5158598	0.595621	4749	316.067	322
GCF_017299175.1	ATCC 13880 substr. Sm_S78_jyu2015	1	2	1	5117303	5160494	0.597811	4740	314.634	298
GCF_017299435.1	ATCC 13880 substr. Sm_S95_jyu2015	1	2	1	5118600	5161789	0.597793	4745	315.226	298
GCF_017301275.1	ATCC 13880 substr. Sm_S13_jyu2015	1	2	1	5118579	5161769	0.597794	4742	315.068	298
GCF_017654245.1	ATCC 13880	1	1	1	5140264	5140264	0.597799	4709	314.937	293
GCF_019344315.1	LVF3	1	2	1	5440698	5528408	0.591972	5071	313.398	393
GCF_900029885.1	SMB2099	1	1	1	5123091	5123091	0.600465	4642	318.081	285
GCF_904866365.1	NA	1	4	1	5541541	5875257	0.587132	5323	308.666	555

## Sheet: Tab. S3
Tab. S3. Data for U-curves. Presented are tool-wise (Panaroo, Roary, PEPPAN) frequencies of gene clusters presented in a certain number of genomes (from 1 to 73).
Number of genomes	Frequency	Tool
1	4674	Panaroo
2	1691	Panaroo
3	750	Panaroo
4	791	Panaroo
5	564	Panaroo
6	352	Panaroo
7	247	Panaroo
8	302	Panaroo
9	144	Panaroo
10	142	Panaroo
11	73	Panaroo
12	61	Panaroo
13	81	Panaroo
14	119	Panaroo
15	51	Panaroo
16	55	Panaroo
17	33	Panaroo
18	37	Panaroo
19	24	Panaroo
20	64	Panaroo
21	48	Panaroo
22	33	Panaroo
23	39	Panaroo
24	36	Panaroo
25	37	Panaroo
26	32	Panaroo
27	32	Panaroo
28	46	Panaroo
29	24	Panaroo
30	33	Panaroo
31	32	Panaroo
32	23	Panaroo
33	30	Panaroo
34	35	Panaroo
35	25	Panaroo
36	19	Panaroo
37	16	Panaroo
38	39	Panaroo
39	23	Panaroo
40	30	Panaroo
41	28	Panaroo
42	60	Panaroo
43	18	Panaroo
44	15	Panaroo
45	10	Panaroo
46	21	Panaroo
47	16	Panaroo
48	19	Panaroo
49	21	Panaroo
50	11	Panaroo
51	21	Panaroo
52	23	Panaroo
53	5	Panaroo
54	7	Panaroo
55	14	Panaroo
56	8	Panaroo
57	6	Panaroo
58	6	Panaroo
59	10	Panaroo
60	12	Panaroo
61	10	Panaroo
62	10	Panaroo
63	26	Panaroo
64	22	Panaroo
65	26	Panaroo
66	24	Panaroo
67	30	Panaroo
68	39	Panaroo
69	61	Panaroo
70	156	Panaroo
71	258	Panaroo
72	763	Panaroo
73	2523	Panaroo
1	7954	Roary
2	2207	Roary
3	972	Roary
4	933	Roary
5	685	Roary
6	475	Roary
7	466	Roary
8	504	Roary
9	161	Roary
10	152	Roary
11	122	Roary
12	132	Roary
13	111	Roary
14	125	Roary
15	121	Roary
16	111	Roary
17	64	Roary
18	70	Roary
19	81	Roary
20	119	Roary
21	145	Roary
22	44	Roary
23	31	Roary
24	55	Roary
25	28	Roary
26	43	Roary
27	42	Roary
28	49	Roary
29	20	Roary
30	29	Roary
31	40	Roary
32	24	Roary
33	26	Roary
34	47	Roary
35	34	Roary
36	34	Roary
37	32	Roary
38	47	Roary
39	30	Roary
40	20	Roary
41	19	Roary
42	44	Roary
43	16	Roary
44	23	Roary
45	23	Roary
46	16	Roary
47	13	Roary
48	30	Roary
49	30	Roary
50	12	Roary
51	31	Roary
52	21	Roary
53	16	Roary
54	14	Roary
55	17	Roary
56	12	Roary
57	10	Roary
58	13	Roary
59	6	Roary
60	12	Roary
61	12	Roary
62	15	Roary
63	25	Roary
64	34	Roary
65	48	Roary
66	25	Roary
67	25	Roary
68	36	Roary
69	56	Roary
70	142	Roary
71	274	Roary
72	779	Roary
73	2146	Roary
1	4720	PEPPAN
2	1592	PEPPAN
3	817	PEPPAN
4	770	PEPPAN
5	546	PEPPAN
6	381	PEPPAN
7	275	PEPPAN
8	306	PEPPAN
9	123	PEPPAN
10	144	PEPPAN
11	80	PEPPAN
12	63	PEPPAN
13	80	PEPPAN
14	113	PEPPAN
15	55	PEPPAN
16	56	PEPPAN
17	32	PEPPAN
18	36	PEPPAN
19	24	PEPPAN
20	65	PEPPAN
21	44	PEPPAN
22	39	PEPPAN
23	37	PEPPAN
24	42	PEPPAN
25	44	PEPPAN
26	34	PEPPAN
27	28	PEPPAN
28	44	PEPPAN
29	15	PEPPAN
30	39	PEPPAN
31	42	PEPPAN
32	22	PEPPAN
33	23	PEPPAN
34	23	PEPPAN
35	29	PEPPAN
36	23	PEPPAN
37	8	PEPPAN
38	41	PEPPAN
39	22	PEPPAN
40	29	PEPPAN
41	24	PEPPAN
42	70	PEPPAN
43	17	PEPPAN
44	18	PEPPAN
45	7	PEPPAN
46	17	PEPPAN
47	17	PEPPAN
48	21	PEPPAN
49	24	PEPPAN
50	16	PEPPAN
51	13	PEPPAN
52	34	PEPPAN
53	10	PEPPAN
54	5	PEPPAN
55	12	PEPPAN
56	11	PEPPAN
57	6	PEPPAN
58	5	PEPPAN
59	11	PEPPAN
60	10	PEPPAN
61	8	PEPPAN
62	6	PEPPAN
63	16	PEPPAN
64	23	PEPPAN
65	27	PEPPAN
66	17	PEPPAN
67	37	PEPPAN
68	9	PEPPAN
69	24	PEPPAN
70	61	PEPPAN
71	24	PEPPAN
72	82	PEPPAN
73	3600	PEPPAN

## Sheet: Tab. S4
Tab. S4. Topological comparison between different phylogenetic trees. The similarity was calculated using the tqDist v1.0.2 library as follows: 1-quartet distance. Trees are based on pangenomes reconstructed with Panaroo, Roary, and PEPPAN. Names with the “_acc” postfix denote phylogenies built on pseudo-alignments reflecting the presence/absence of accessory genes. Eight ML (maximum likelihood) …
Trees	Panaroo_core_MAFFT	Panaroo_core_Prank	Panaroo_part_MAFFT	Panaroo_part_Prank	Roary_core_MAFFT	Roary_core_Prank	Roary_part_MAFFT	Roary_part_Prank	Panaroo_acc	Roary_acc	ANI	PEPPAN_acc
Panaroo_core_MAFFT	1	0.976317	0.975671	0.973448	0.967841	0.968405	0.973341	0.967096	0.889148	0.923959	0.909429	0.856009
Panaroo_core_Prank	1	1	0.9733	0.975044	0.965939	0.968215	0.978196	0.963352	0.891362	0.922865	0.909872	0.856009
Panaroo_part_MAFFT	1	1	1	0.986524	0.96636	0.967615	0.96932	0.972411	0.891222	0.923976	0.907016	0.855716
Panaroo_part_Prank	1	1	1	1	0.965828	0.967428	0.970851	0.973285	0.890799	0.925936	0.906518	0.855887
Roary_core_MAFFT	1	1	1	1	1	0.964754	0.968346	0.963796	0.8842	0.918765	0.915534	0.852106
Roary_core_Prank	1	1	1	1	1	1	0.969464	0.968146	0.885658	0.916876	0.90451	0.85196
Roary_part_MAFFT	1	1	1	1	1	1	1	0.967807	0.888136	0.919813	0.909973	0.854007
Roary_part_Prank	1	1	1	1	1	1	1	1	0.890651	0.91949	0.90824	0.850488
Panaroo_acc	1	1	1	1	1	1	1	1	1	0.932589	0.897173	0.842504
Roary_acc	1	1	1	1	1	1	1	1	1	1	0.879637	0.865733
ANI	1	1	1	1	1	1	1	1	1	1	1	0.830881
PEPPAN_acc	1	1	1	1	1	1	1	1	1	1	1	1

## Sheet: Tab. S5
Tab. S5. Quality assessments of the phylogenetic trees analyzed. Presented are mean branch support, three balance indices (‘CollesLike’, ‘Sackin’, and ‘Cophenetic’), and a total balance estimate calculated as the sum of balance indices divided by the maximum value for each index. Trees are based on pangenomes reconstructed with Panaroo, Roary, and PEPPAN. Names with the “_acc” postfix denote phyl…
Tree	Support	CollesLike	Sackin	Cophenetic	Balance_ind
Roary_acc	90.0068	656	854	13678	2.29976
ANI	80.2247	547.285	909	7988	1.89439
Panaroo_core_MAFFT	70.8333	866.215	1132	17328	2.99824
Panaroo_core_Prank	69.3229	812.635	1090	15459	2.79148
Panaroo_part_MAFFT	68.1042	726.737	974	10549	2.30667
Panaroo_part_Prank	67.3125	831.771	1073	15099	2.77781
Roary_core_MAFFT	69.5	864	1071	15049	2.81037
Roary_core_Prank	70.5208	859	1134	15011	2.85796
Roary_part_MAFFT	69.4583	755.653	1036	13956	2.59134
Roary_part_Prank	69.3229	861	1004	15078	2.74949
Panaroo_acc	93.0932	635.502	961	12473	2.30091
PEPPAN_acc	97.7	381.855	791	11246	1.78737

## Sheet: Tab. S6
Tab. S6. Total run-time in seconds of RAxML-NG launched on core SNPs obtained from pangenomes reconstructed with Roary and Panaroo Trees are encoded by labels with tree parts separated by underscores: the first encodes pangenomic tool, the second represents either concatenated alignment with a single evolutionary model (“_core_”) or partitioned alignment with individual evolutionary models per tr…
Tree	Time, s
Panaroo_core_MAFFT	753746
Panaroo_core_Prank	1.08443e+06
Panaroo_part_MAFFT	5.58957e+06
Panaroo_part_Prank	5.53769e+06
Roary_core_MAFFT	1.6278e+06
Roary_core_Prank	1.54265e+06
Roary_part_MAFFT	6.8038e+06
Roary_part_Prank	7.21296e+06

## Sheet: Tab. S7
Tab. S7. Host attributions of the Serratia marcescens assemblies. Presented are initial metadata from the BioSample database and the host-wise groups used in the current study, namely, human, insect, plant, and assemblies lacking annotations marked as ‘None’.
Assembly	Host species	Host group
GCF_009834305.1_ASM983430v1	Apis mellifera	Insect
GCF_015708655.1_ASM1570865v1	Curculio caryae	Insect
GCF_013122155.1_ASM1312215v1	Drosophila melanogaster	Insect
GCF_000783915.2_ASM78391v2	Homo sapiens	Human
GCF_001022215.1_ASM102221v1	Homo sapiens	Human
GCF_001294565.1_ASM129456v1	Homo sapiens	Human
GCF_001672055.1_ASM167205v1	Homo sapiens	Human
GCF_002220515.1_ASM222051v1	Homo sapiens	Human
GCF_002220535.1_ASM222053v1	Homo sapiens	Human
GCF_002220555.1_ASM222055v1	Homo sapiens	Human
GCF_002220575.1_ASM222057v1	Homo sapiens	Human
GCF_002220595.1_ASM222059v1	Homo sapiens	Human
GCF_002220615.1_ASM222061v1	Homo sapiens	Human
GCF_002220635.1_ASM222063v1	Homo sapiens	Human
GCF_002220655.1_ASM222065v1	Homo sapiens	Human
GCF_002220675.1_ASM222067v1	Homo sapiens	Human
GCF_002220695.1_ASM222069v1	Homo sapiens	Human
GCF_002220715.1_ASM222071v1	Homo sapiens	Human
GCF_003031545.1_ASM303154v1	Homo sapiens	Human
GCF_003031645.1_ASM303164v1	Homo sapiens	Human
GCF_003146705.1_ASM314670v1	Homo sapiens	Human
GCF_003186475.1_ASM318647v1	Homo sapiens	Human
GCF_006711125.1_ASM671112v1	Homo sapiens	Human
GCF_006711145.1_ASM671114v1	Homo sapiens	Human
GCF_006711245.1_ASM671124v1	Homo sapiens	Human
GCF_006711405.1_ASM671140v1	Homo sapiens	Human
GCF_006711525.1_ASM671152v1	Homo sapiens	Human
GCF_006716725.1_ASM671672v1	Homo sapiens	Human
GCF_006716825.1_ASM671682v1	Homo sapiens	Human
GCF_006842785.1_ASM684278v1	Homo sapiens	Human
GCF_009858195.1_ASM985819v1	Homo sapiens	Human
GCF_009909345.1_ASM990934v1	Homo sapiens	Human
GCF_009909365.1_ASM990936v1	Homo sapiens	Human
GCF_009909385.1_ASM990938v1	Homo sapiens	Human
GCF_009909405.1_ASM990940v1	Homo sapiens	Human
GCF_009909425.1_ASM990942v1	Homo sapiens	Human
GCF_011769885.1_ASM1176988v1	Homo sapiens	Human
GCF_013426135.1_ASM1342613v1	Homo sapiens	Human
GCF_013426155.1_ASM1342615v1	Homo sapiens	Human
GCF_015074945.1_ASM1507494v1	Homo sapiens	Human
GCF_011602465.1_ASM1160246v1	Jatropha curcas	Plant
GCF_000336425.1_ASM33642v1	None	None	water
GCF_000513215.1_DB11	None	None	insect
GCF_000828775.1_ASM82877v1	None	None	clinical
GCF_002947235.1_ASM294723v1	None	None	AR_collection(possibly clinical)
GCF_002996885.1_ASM299688v1	None	None	AR_collection(possibly clinical)
GCF_002997125.1_ASM299712v1	None	None	AR_collection(possibly clinical)
GCF_003071565.1_ASM307156v1	None	None	AR_collection(possibly clinical)
GCF_003071585.1_ASM307158v1	None	None	AR_collection(possibly clinical)
GCF_003071605.1_ASM307160v1	None	None	AR_collection(possibly clinical)
GCF_003071625.1_ASM307162v1	None	None	AR_collection(possibly clinical)
GCF_003204075.1_ASM320407v1	None	None	AR_collection(possibly clinical)
GCF_003204405.1_ASM320440v1	None	None	AR_collection(possibly clinical)
GCF_003355135.1_ASM335513v1	None	None	biocontrol of soil-borne plant pathogens
GCF_003967055.1_ASM396705v1	None	None	soil
GCF_006974205.1_ASM697420v1	None	None	pond water
GCF_008364265.2_ASM836426v2	None	None	food
GCF_008931425.1_ASM893142v1	None	None	Environment (clonical bathroom)
GCF_009936295.1_ASM993629v1	None	None	Geographical location
GCF_013112395.1_ASM1311239v1	None	None	soil
GCF_013367735.1_ASM1336773v1	None	None	soil
GCF_013377375.1_ASM1337737v1	None	None	soil (ginger field)
GCF_017299175.1_ASM1729917v1	None	None	pond water - type strain - pathogenic later
GCF_017299435.1_ASM1729943v1	None	None	pond water - type strain - pathogenic later
GCF_017301275.1_ASM1730127v1	None	None	pond water - type strain - pathogenic later
GCF_019344315.1_ASM1934431v1	None	None	oligotrophic pond
GCF_900029885.1_Sm_SMB2099	None	None	clinical isolate
GCF_904866365.1_MSB1_9C	None	None	Human host (error)
GCF_003182655.1_ASM318265v1	not applicable	None	air
GCF_017654245.1_ASM1765424v1	not collected	None	pond water - type strain - pathogenic later
GCF_015160915.1_ASM1516091v1	silkworm	Insect
GCF_001280365.1_ASM128036v1	Solanum nigrum	Plant
GCF_001417865.2_ASM141786v2	Zea mays	Plant

## Sheet: Tab. S8
Tab. S8. Scoary-reported significant specificity factors determining host preference towards humans. Shown are gene clusters and respective annotations, the number of human-attributed genomes in which the factor is present (Number_pos_present_in) or absent (Number_pos_not_present_in), and the number of non-human-attributed genomes in which the factor is present (Number_neg_present_in) or absent (…
Gene	Annotation	Number_pos_present_in	Number_neg_present_in	Number_pos_not_present_in	Number_neg_not_present_in	Num	P_val	None_num	Human_num	Insect_num	Plant_num
group_11317	hypothetical protein	23	5	14	31	28	0.0126933	3	23	1	1
group_11502	hypothetical protein;transporter	24	6	13	30	30	0.0149429	4	24	1	1
group_10140	YgdI/YgdR family lipoprotein	34	18	3	18	52	0.0263694	16	34	1	1
group_9367	YgdI/YgdR family lipoprotein	34	18	3	18	52	0.0263694	16	34	1	1
group_9308	MgtC/SapB family protein	35	20	2	16	55	0.0293685	16	35	1	3
group_8256	LysR family transcriptional regulator	35	20	2	16	55	0.0293685	16	35	1	3
group_6428	ABC transporter ATP-binding protein	35	20	2	16	55	0.0293685	16	35	1	3
group_9856	ABC transporter permease subunit	35	20	2	16	55	0.0293685	16	35	1	3

## Sheet: Tab. S9
Tab. S9. Scoary-reported significant specificity factors determining host preference towards different hosts. The type of factors is denoted by the column named “Host”. Shown are gene clusters and respective annotations, the number of host-specific genomes in which the factor is present (Number_pos_present_in) or absent (Number_pos_not_present_in), and the number of genomes related to other hosts…
Gene	Annotation	Host	Number_pos_present_in	Number_neg_present_in	Number_pos_not_present_in	Number_neg_not_present_in	Num	P_val	None_num	Human_num	Insect_num	Plant_num
group_11317	hypothetical protein	Human	23	5	14	31	28	2.95413e-05	3	23	1	1
group_11502	hypothetical protein;transporter	Human	24	6	13	30	30	3.90031e-05	4	24	1	1
group_10140	YgdI/YgdR family lipoprotein	Human	34	18	3	18	52	8.13419e-05	16	34	1	1
group_9367	YgdI/YgdR family lipoprotein	Human	34	18	3	18	52	8.13419e-05	16	34	1	1
group_9308	MgtC/SapB family protein	Human	35	20	2	16	55	0.000105188	16	35	1	3
group_8256	LysR family transcriptional regulator	Human	35	20	2	16	55	0.000105188	16	35	1	3
group_6428	ABC transporter ATP-binding protein	Human	35	20	2	16	55	0.000105188	16	35	1	3
group_9856	ABC transporter permease subunit	Human	35	20	2	16	55	0.000105188	16	35	1	3
group_9232	VOC family protein	Human	37	26	0	10	63	0.000409105	20	37	3	3
group_9855	porin	Human	34	20	3	16	54	0.000461891	16	34	1	3
group_7387	ABC transporter ATP-binding protein	Human	34	20	3	16	54	0.000461891	16	34	1	3
group_11311	ankyrin repeat domain-containing protein	Human	31	16	6	20	47	0.000586527	14	31	1	1
group_11682	phage baseplate assembly protein V	Human	13	1	24	35	14	0.000604902	0	13	0	1
group_11033	hypothetical protein	Human	13	1	24	35	14	0.000604902	0	13	0	1
group_8593	phage tail assembly protein	Human	13	1	24	35	14	0.000604902	0	13	0	1
group_11681	replication endonuclease	Human	13	1	24	35	14	0.000604902	0	13	0	1
group_10849	GpE family phage tail protein	Human	13	1	24	35	14	0.000604902	0	13	0	1
group_8592	phage tail sheath protein	Human	13	1	24	35	14	0.000604902	0	13	0	1
group_13367	phage major tail tube protein	Human	13	1	24	35	14	0.000604902	0	13	0	1
group_11605	phage tail protein I	Human	13	1	24	35	14	0.000604902	0	13	0	1
group_10652	hypothetical protein	Human	13	1	24	35	14	0.000604902	0	13	0	1
group_8121	helix-turn-helix domain-containing protein;phage repressor protein CI	Human	13	1	24	35	14	0.000604902	0	13	0	1
group_11944	GPW/gp25 family protein	Human	13	1	24	35	14	0.000604902	0	13	0	1
group_11535	TraR/DksA C4-type zinc finger protein	Human	13	1	24	35	14	0.000604902	0	13	0	1
group_9081	lysozyme	Human	13	1	24	35	14	0.000604902	0	13	0	1
group_7745	hypothetical protein	Human	13	1	24	35	14	0.000604902	1	13	0	0
group_11909	baseplate assembly protein	Human	13	1	24	35	14	0.000604902	0	13	0	1
group_11034	phage tail protein	Human	13	1	24	35	14	0.000604902	0	13	0	1
group_9080	tail protein X	Human	13	1	24	35	14	0.000604902	0	13	0	1
group_1375	hypothetical protein	Human	13	1	24	35	14	0.000604902	0	13	0	1
group_9287	CopG family transcriptional regulator;ribbon-helix-helix domain-containing protein;ribbon-helix-helix protein CopG family	Human	33	19	4	17	52	0.000721129	16	33	1	2
group_6266	type II toxin-antitoxin system VapC family toxin	Human	33	19	4	17	52	0.000721129	16	33	1	2
group_9630	GNAT family N-acetyltransferase	Human	23	8	14	28	31	0.000832498	6	23	1	1
group_11594	gamma-glutamylcyclotransferase	Human	28	13	9	23	41	0.000920948	12	28	1	0
group_9924	DUF1937 family protein	Human	28	13	9	23	41	0.000920948	11	28	1	1
group_11822	undecaprenyl-phosphate glucose phosphotransferase	Human	10	0	27	36	10	0.000969729	0	10	0	0
group_11970	hypothetical protein	Human	32	18	5	18	50	0.00101092	13	32	2	3
group_8312	metallophosphoesterase	Human	19	5	18	31	24	0.00101092	4	19	1	0
group_11400	helix-turn-helix domain-containing protein;helix-turn-helix transcriptional regulator	Human	19	5	18	31	24	0.00101092	4	19	1	0
group_10734	hypothetical protein	Human	19	5	18	31	24	0.00101092	4	19	1	0
group_9809	VUT family protein	Human	19	5	18	31	24	0.00101092	4	19	1	0
group_9174	type II toxin-antitoxin system RelE/ParE family toxin	Human	12	1	25	35	13	0.00137793	1	12	0	0
group_6191	helix-turn-helix domain-containing protein	Human	12	1	25	35	13	0.00137793	1	12	0	0
group_10848	tail fiber assembly protein	Human	12	1	25	35	13	0.00137793	0	12	0	1
group_8926	PLP-dependent aminotransferase family protein;aminotransferase class I/II-fold pyridoxal phosphate-dependent enzyme	Human	36	25	1	11	61	0.00137793	19	36	3	3
group_6598	carboxymuconolactone decarboxylase family protein	Human	36	25	1	11	61	0.00137793	19	36	3	3
group_8244	DNA-binding protein	Human	21	7	16	29	28	0.00159502	6	21	0	1
group_9887	phosphatase PAP2 family protein	Human	21	7	16	29	28	0.00159502	5	21	1	1
group_10198	YrzE family protein;CAP-Gly protein	Human	30	16	7	20	46	0.00159502	14	30	1	1
group_6283	Tar ligand binding domain-containing protein;methyl-accepting chemotaxis protein	Human	30	16	7	20	46	0.00159502	10	30	3	3
group_12412	MFS transporter	Human	18	5	19	31	23	0.0021828	3	18	0	2
group_6808	hypothetical protein	Human	18	5	19	31	23	0.0021828	3	18	1	1
group_5374	AEC family transporter	Human	18	5	19	31	23	0.0021828	4	18	1	0
group_10397	polysaccharide pyruvyl transferase family protein	Human	9	0	28	36	9	0.00225116	0	9	0	0
group_6223	lipopolysaccharide biosynthesis protein;oligosaccharide flippase family protein	Human	9	0	28	36	9	0.00225116	0	9	0	0
group_12134	glycosyltransferase family 4 protein	Human	9	0	28	36	9	0.00225116	0	9	0	0
group_9747	glycosyltransferase;hypothetical protein	Human	9	0	28	36	9	0.00225116	0	9	0	0
group_5888	MFS transporter	Human	9	0	28	36	9	0.00225116	0	9	0	0
group_12031	hypothetical protein;glycoside hydrolase family 5 protein	Human	9	0	28	36	9	0.00225116	0	9	0	0
group_9546	amidohydrolase;M20 family metallopeptidase	Human	9	0	28	36	9	0.00225116	0	9	0	0
group_5378	LysR family transcriptional regulator	Human	9	0	28	36	9	0.00225116	0	9	0	0
group_11838	glycosyltransferase	Human	9	0	28	36	9	0.00225116	0	9	0	0
group_7907	LysE family translocator	Human	9	0	28	36	9	0.00225116	0	9	0	0
group_4422	IS6-like element IS26 family transposase	Human	9	0	28	36	9	0.00225116	0	9	0	0
group_11452	hypothetical protein	Human	9	0	28	36	9	0.00225116	0	9	0	0
group_7817	phytanoyl-CoA dioxygenase family protein	Human	9	0	28	36	9	0.00225116	0	9	0	0
group_4378	IS200/IS605 family transposase	Human	9	0	28	36	9	0.00225116	0	9	0	0
group_6541	NAD(P)/FAD-dependent oxidoreductase	Human	26	12	11	24	38	0.00227063	10	26	1	1
group_6543	AraC family transcriptional regulator	Human	19	6	18	30	25	0.00279218	5	19	1	0
group_9926	AzlC family ABC transporter permease	Human	19	6	18	30	25	0.00279218	5	19	1	0
group_9921	hypothetical protein	Human	19	6	18	30	25	0.00279218	5	19	0	1
group_8777	pyridoxamine 5'-phosphate oxidase family protein	Human	35	24	2	12	59	0.00285956	19	35	3	2
group_9198	diguanylate cyclase	Human	35	24	2	12	59	0.00285956	18	35	4	2
group_10258	acyltransferase	Human	13	2	24	34	15	0.00285956	1	13	0	1
group_13664	phage tail protein	Human	11	1	26	35	12	0.00305205	0	11	0	1
group_8651	phage late control D family protein	Human	11	1	26	35	12	0.00305205	0	11	0	1
group_8650	phage tail tape measure protein	Human	11	1	26	35	12	0.00305205	0	11	0	1
group_11806	heavy-metal-associated domain-containing protein	Human	16	4	21	32	20	0.00334948	3	16	0	1
group_6523	hypothetical protein	Human	16	4	21	32	20	0.00334948	3	16	1	0
group_12126	heavy metal translocating P-type ATPase	Human	16	4	21	32	20	0.00334948	3	16	0	1
group_12015	Cu(I)-responsive transcriptional regulator	Human	16	4	21	32	20	0.00334948	3	16	0	1
group_9944	hypothetical protein	Human	30	17	7	19	47	0.0033747	16	30	1	0
group_6076	iron-sulfur cluster repair protein YtfE	Human	29	16	8	20	45	0.003897	15	29	1	0
group_8000	DJ-1/PfpI family protein;glutamine amidotransferase	Human	22	9	15	27	31	0.00433156	7	22	1	1
group_9923	glycerol kinase	Human	26	13	11	23	39	0.00485836	11	26	1	1
group_9567	FAD-dependent oxidoreductase;NAD(P)-binding protein	Human	26	13	11	23	39	0.00485836	11	26	1	1
group_6536	ethanolamine utilization protein EutH	Human	26	13	11	23	39	0.00485836	11	26	1	1
group_5919	DeoR/GlpR family DNA-binding transcription regulator	Human	26	13	11	23	39	0.00485836	11	26	1	1
group_5674	hypothetical protein	Human	8	0	29	36	8	0.00512332	0	8	0	0
group_15061	transcriptional regulator	Human	8	0	29	36	8	0.00512332	0	8	0	0
group_4436	carbapenem-hydrolyzing class A beta-lactamase KPC-2	Human	8	0	29	36	8	0.00512332	0	8	0	0
group_10893	helix-turn-helix domain-containing protein	Human	8	0	29	36	8	0.00512332	0	8	0	0
group_4423	IS6-like element IS26 family transposase	Human	8	0	29	36	8	0.00512332	0	8	0	0
group_9159	antirestriction protein	Human	8	0	29	36	8	0.00512332	0	8	0	0
group_2280	hypothetical protein	Human	8	0	29	36	8	0.00512332	0	8	0	0
group_8720	hypothetical protein;Cro/CI family transcriptional regulator	Human	8	0	29	36	8	0.00512332	0	8	0	0
group_1040	hypothetical protein	Human	8	0	29	36	8	0.00512332	0	8	0	0
group_11972	spore coat U domain-containing protein	Human	18	6	19	30	24	0.00569844	4	18	1	1
group_11185	spore coat U domain-containing protein	Human	18	6	19	30	24	0.00569844	4	18	1	1
group_12661	hypothetical protein	Human	12	2	25	34	14	0.00601607	1	12	0	1
group_12552	immunity 26/phosphotriesterase HocA family protein;hypothetical protein;phosphotriesterase	Human	10	1	27	35	11	0.00657598	1	10	0	0
group_4255	biotin synthase BioB	Human	10	1	27	35	11	0.00657598	1	10	0	0
group_10906	hypothetical protein	Human	15	4	22	32	19	0.00681459	3	15	0	1
group_9791	hypothetical protein	Human	15	4	22	32	19	0.00681459	3	15	0	1
group_9478	DUF943 family protein	Human	15	4	22	32	19	0.00681459	3	15	0	1
group_12014	efflux transporter outer membrane subunit	Human	15	4	22	32	19	0.00681459	3	15	0	1
group_6319	hypothetical protein	Human	15	4	22	32	19	0.00681459	3	15	0	1
group_11371	efflux RND transporter periplasmic adaptor subunit	Human	15	4	22	32	19	0.00681459	3	15	0	1
group_13170	AMP-binding protein;hypothetical protein;amino acid adenylation domain-containing protein;non-ribosomal peptide synthetase;alpha/beta fold hydrolase	Human	27	15	10	21	42	0.00934417	13	27	1	1
group_5801	MipA/OmpV family protein	Human	13	3	24	33	16	0.00954709	1	13	1	1
group_9510	M48 family metallopeptidase;M48 family metalloprotease	Human	13	3	24	33	16	0.00954709	1	13	1	1
group_10565	glycosyltransferase family 9 protein	Human	26	14	11	22	40	0.00980145	13	26	1	0
group_11282	GFA family protein	Human	23	11	14	25	34	0.00980145	8	23	1	2
group_6978	hypothetical protein	Human	17	6	20	30	23	0.0111477	4	17	1	1
group_10975	AzlD domain-containing protein	Human	17	6	20	30	23	0.0111477	5	17	1	0
group_8863	hypothetical protein	Human	17	6	20	30	23	0.0111477	3	17	1	2
group_13032	hypothetical protein	Human	7	0	30	36	7	0.0114421	0	7	0	0
group_9850	aminotransferase class I/II-fold pyridoxal phosphate-dependent enzyme	Human	7	0	30	36	7	0.0114421	0	7	0	0
group_5791	GntR family transcriptional regulator	Human	7	0	30	36	7	0.0114421	0	7	0	0
group_14271	relaxosome protein TraM	Human	7	0	30	36	7	0.0114421	0	7	0	0
group_13018	hypothetical protein	Human	7	0	30	36	7	0.0114421	0	7	0	0
group_9154	hypothetical protein	Human	7	0	30	36	7	0.0114421	0	7	0	0
group_2097	sodium:solute symporter family protein	Human	7	0	30	36	7	0.0114421	0	7	0	0
group_14203	hypothetical protein	Human	7	0	30	36	7	0.0114421	0	7	0	0
group_12999	hypothetical protein	Human	7	0	30	36	7	0.0114421	0	7	0	0
group_8248	TraY domain-containing protein	Human	7	0	30	36	7	0.0114421	0	7	0	0
group_754	hypothetical protein	Human	7	0	30	36	7	0.0114421	0	7	0	0
group_13980	translesion error-prone DNA polymerase V autoproteolytic subunit	Human	7	0	30	36	7	0.0114421	0	7	0	0
group_11470	hypothetical protein	Human	7	0	30	36	7	0.0114421	0	7	0	0
group_7914	creatininase family protein	Human	7	0	30	36	7	0.0114421	0	7	0	0
group_13087	tape measure protein;tape measure domain-containing protein	Human	7	0	30	36	7	0.0114421	0	7	0	0
group_10573	beta-aspartyl-peptidase	Human	7	0	30	36	7	0.0114421	0	7	0	0
group_6414	hypothetical protein	Human	7	0	30	36	7	0.0114421	0	7	0	0
group_8193	GNAT family N-acetyltransferase	Human	37	30	0	6	67	0.0114421	26	37	2	2
group_10579	ABC transporter ATP-binding protein/permease	Human	11	2	26	34	13	0.0122597	2	11	0	0
group_12139	RhtX/FptX family siderophore transporter	Human	11	2	26	34	13	0.0122597	2	11	0	0
group_7930	ABC transporter ATP-binding protein/permease	Human	11	2	26	34	13	0.0122597	2	11	0	0
group_12046	PepSY domain-containing protein	Human	11	2	26	34	13	0.0122597	2	11	0	0
group_5985	AraC family transcriptional regulator	Human	11	2	26	34	13	0.0122597	2	11	0	0
group_11861	hypothetical protein	Human	11	2	26	34	13	0.0122597	2	11	0	0
group_4376	IS200/IS605 family transposase	Human	11	2	26	34	13	0.0122597	1	11	0	1
group_11517	TonB-dependent siderophore receptor	Human	11	2	26	34	13	0.0122597	2	11	0	0
group_12404	LysR family transcriptional regulator	Human	30	19	7	17	49	0.0131717	14	30	3	2
group_5828	hypothetical protein	Human	18	7	19	29	25	0.0131717	4	18	2	1
group_11803	efflux RND transporter permease subunit	Human	14	4	23	32	18	0.0133563	3	14	0	1
group_7489	urea transporter	Human	14	4	23	32	18	0.0133563	2	14	1	1
group_11358	urease accessory protein UreE	Human	14	4	23	32	18	0.0133563	2	14	1	1
group_6208	urease subunit beta	Human	14	4	23	32	18	0.0133563	2	14	1	1
group_10358	urease accessory protein UreD	Human	14	4	23	32	18	0.0133563	2	14	1	1
group_4149	HoxN/HupN/NixA family nickel/cobalt transporter	Human	14	4	23	32	18	0.0133563	2	14	1	1
group_8423	urease accessory protein UreF	Human	14	4	23	32	18	0.0133563	2	14	1	1
group_1600	urease subunit alpha	Human	14	4	23	32	18	0.0133563	2	14	1	1
group_15012	urease subunit gamma	Human	14	4	23	32	18	0.0133563	2	14	1	1
group_7726	urease accessory protein UreG	Human	14	4	23	32	18	0.0133563	2	14	1	1
group_15064	helix-turn-helix domain-containing protein	Human	9	1	28	35	10	0.013784	0	9	1	0
group_8928	SDR family oxidoreductase	Human	9	1	28	35	10	0.013784	1	9	0	0
group_4444	GntR family transcriptional regulator	Human	9	1	28	35	10	0.013784	1	9	0	0
group_14960	hypothetical protein	Human	9	1	28	35	10	0.013784	1	9	0	0
group_7563	amidase	Human	9	1	28	35	10	0.013784	1	9	0	0
group_4384	IS200/IS605 family transposase	Human	9	1	28	35	10	0.013784	1	9	0	0
group_14849	type II toxin-antitoxin system RelE/ParE family toxin	Human	9	1	28	35	10	0.013784	0	9	1	0
group_7178	GTP-binding protein	Human	9	1	28	35	10	0.013784	1	9	0	0
group_3281	hypothetical protein	Human	9	1	28	35	10	0.013784	1	9	0	0
group_10697	alpha/beta hydrolase;alpha/beta fold hydrolase	Human	36	28	1	8	64	0.013784	21	36	4	3
group_11666	RepA leader peptide Tap	Human	9	1	28	35	10	0.013784	1	9	0	0
group_5927	polysaccharide deacetylase	Human	9	1	28	35	10	0.013784	1	9	0	0
group_2761	MFS transporter	Human	9	1	28	35	10	0.013784	1	9	0	0
group_7487	aldo/keto reductase	Human	36	28	1	8	64	0.013784	22	36	4	2
group_10996	incFII family plasmid replication initiator RepA	Human	9	1	28	35	10	0.013784	1	9	0	0
group_5319	SDR family oxidoreductase	Human	9	1	28	35	10	0.013784	1	9	0	0
group_9656	hypothetical protein	Human	19	8	18	28	27	0.0149921	5	19	1	2
group_12059	glycoside hydrolase	Human	28	17	9	19	45	0.0165504	15	28	1	1
group_11469	LacI family DNA-binding transcriptional regulator	Human	28	17	9	19	45	0.0165504	15	28	1	1
group_6044	hypothetical protein	Human	28	17	9	19	45	0.0165504	15	28	1	1
group_4575	TauD/TfdA family dioxygenase	Human	15	5	22	31	20	0.0172099	4	15	1	0
group_7422	hypothetical protein	Human	12	3	25	33	15	0.0186421	2	12	1	0
group_6779	hypothetical protein	Human	12	3	25	33	15	0.0186421	2	12	0	1
group_6457	LysR family transcriptional regulator	Human	12	3	25	33	15	0.0186421	2	12	0	1
group_10941	hypothetical protein	Human	12	3	25	33	15	0.0186421	2	12	1	0
group_4379	IS200/IS605 family transposase	Human	12	3	25	33	15	0.0186421	2	12	0	1
group_9780	GMC family oxidoreductase N-terminal domain-containing protein	Human	12	3	25	33	15	0.0186421	2	12	0	1
group_6280	hypothetical protein	Human	22	11	15	25	33	0.0187184	10	22	1	0
group_11478	ABC transporter ATP-binding protein;ATP-binding cassette domain-containing protein	Human	26	15	11	21	41	0.0187184	13	26	1	1
group_538	TonB-dependent receptor	Human	25	14	12	22	39	0.0192757	13	25	1	0
group_13351	sigma-70 family RNA polymerase sigma factor	Human	25	14	12	22	39	0.0192757	13	25	1	0
group_11514	O-antigen ligase family protein	Human	25	14	12	22	39	0.0192757	13	25	1	0
group_9523	energy transducer TonB;TonB family protein	Human	25	14	12	22	39	0.0192757	13	25	1	0
group_8584	DUF4880 domain-containing protein	Human	25	14	12	22	39	0.0192757	13	25	1	0
group_10343	winged helix-turn-helix domain-containing protein;hypothetical protein	Human	24	13	13	23	37	0.0194628	11	24	1	1
group_9359	hypothetical protein	Human	16	6	21	30	22	0.0209293	5	16	0	1
group_5407	helix-turn-helix transcriptional regulator	Human	16	6	21	30	22	0.0209293	5	16	0	1
group_12208	DUF2975 domain-containing protein	Human	16	6	21	30	22	0.0209293	5	16	0	1
group_10698	hypothetical protein	Human	16	6	21	30	22	0.0209293	5	16	0	1
group_10095	GNAT family N-acetyltransferase	Human	35	27	2	9	62	0.0241956	20	35	4	3
group_11127	ATP-binding protein	Human	35	27	2	9	62	0.0241956	22	35	2	3
group_11960	hypothetical protein	Human	10	2	27	34	12	0.0241956	0	10	0	2
group_10716	hypothetical protein	Human	10	2	27	34	12	0.0241956	2	10	0	0
group_11140	hypothetical protein	Human	17	7	20	29	24	0.0243816	7	17	0	0
group_10662	hypothetical protein	Human	17	7	20	29	24	0.0243816	4	17	2	1
group_15033	antibiotic biosynthesis monooxygenase	Human	6	0	31	36	6	0.0250988	0	6	0	0
group_12893	DUF2913 family protein	Human	6	0	31	36	6	0.0250988	0	6	0	0
group_11849	hypothetical protein	Human	6	0	31	36	6	0.0250988	0	6	0	0
group_8551	helix-turn-helix domain-containing protein;MarR family transcriptional regulator	Human	6	0	31	36	6	0.0250988	0	6	0	0
group_5411	glycosyltransferase	Human	6	0	31	36	6	0.0250988	0	6	0	0
group_4911	IS481-like element ISKpn27 family transposase	Human	6	0	31	36	6	0.0250988	0	6	0	0
group_3537	PLP-dependent aspartate aminotransferase family protein	Human	6	0	31	36	6	0.0250988	0	6	0	0
group_14936	hypothetical protein	Human	6	0	31	36	6	0.0250988	0	6	0	0
group_12601	hypothetical protein	Human	6	0	31	36	6	0.0250988	0	6	0	0
group_11540	TetR family transcriptional regulator	Human	6	0	31	36	6	0.0250988	0	6	0	0
group_8432	hypothetical protein	Human	6	0	31	36	6	0.0250988	0	6	0	0
group_5203	cupin domain-containing protein	Human	6	0	31	36	6	0.0250988	0	6	0	0
group_4735	recombinase family protein	Human	6	0	31	36	6	0.0250988	0	6	0	0
group_3231	EpsG family protein	Human	6	0	31	36	6	0.0250988	0	6	0	0
group_14797	barstar family protein	Human	6	0	31	36	6	0.0250988	0	6	0	0
group_12580	hypothetical protein	Human	6	0	31	36	6	0.0250988	0	6	0	0
group_10721	phage regulatory protein/antirepressor Ant	Human	6	0	31	36	6	0.0250988	0	6	0	0
group_7658	type VI secretion system tip protein VgrG	Human	6	0	31	36	6	0.0250988	0	6	0	0
group_5144	serine dehydratase subunit alpha family protein;L-serine ammonia-lyase iron-sulfur-dependent subunit alpha	Human	6	0	31	36	6	0.0250988	0	6	0	0
group_4734	Tn3-like element TnAs1 family transposase	Human	6	0	31	36	6	0.0250988	0	6	0	0
group_2557	sodium:proton antiporter	Human	6	0	31	36	6	0.0250988	0	6	0	0
group_13953	protein tyrosine phosphatase	Human	6	0	31	36	6	0.0250988	0	6	0	0
group_12463	LuxR family transcriptional regulator;LuxR C-terminal-related transcriptional regulator	Human	6	0	31	36	6	0.0250988	0	6	0	0
group_9535	hypothetical protein	Human	6	0	31	36	6	0.0250988	0	6	0	0
group_5830	hypothetical protein	Human	6	0	31	36	6	0.0250988	0	6	0	0
group_5119	retron St85 family RNA-directed DNA polymerase	Human	6	0	31	36	6	0.0250988	0	6	0	0
group_4091	glycosyltransferase family 4 protein	Human	6	0	31	36	6	0.0250988	0	6	0	0
group_864	tyrosine-protein kinase Wzc	Human	6	0	31	36	6	0.0250988	0	6	0	0
group_12962	tolA family protein	Human	6	0	31	36	6	0.0250988	0	6	0	0
group_12335	DUF3088 family protein;DUF3088 domain-containing protein	Human	6	0	31	36	6	0.0250988	0	6	0	0
group_8726	ISL3 family transposase	Human	6	0	31	36	6	0.0250988	0	6	0	0
group_5513	glutaredoxin 2;hypothetical protein	Human	6	0	31	36	6	0.0250988	0	6	0	0
group_5099	retron St85 family effector protein	Human	6	0	31	36	6	0.0250988	0	6	0	0
group_3755	glycosyltransferase	Human	6	0	31	36	6	0.0250988	0	6	0	0
group_728	hypothetical protein	Human	6	0	31	36	6	0.0250988	0	6	0	0
group_12180	UDP-glucose 4-epimerase GalE	Human	37	31	0	5	68	0.0250988	24	37	4	3
group_9631	NAD(P)H-dependent oxidoreductase	Human	37	31	0	5	68	0.0250988	26	37	3	2
group_11329	response regulator	Human	37	31	0	5	68	0.0250988	24	37	4	3
group_8819	RidA family protein	Human	37	31	0	5	68	0.0250988	24	37	4	3
group_11016	DUF2076 domain-containing protein;DUF2076 family protein	Human	37	31	0	5	68	0.0250988	24	37	4	3
group_7349	oxygenase MpaB family protein	Human	37	31	0	5	68	0.0250988	24	37	4	3
group_10496	DNA-binding transcriptional regulator DsdC	Human	37	31	0	5	68	0.0250988	24	37	4	3
group_2276	sugar ABC transporter ATP-binding protein	Human	37	31	0	5	68	0.0250988	24	37	4	3
group_9967	hypothetical protein	Human	37	31	0	5	68	0.0250988	24	37	4	3
group_9188	type VI secretion system ImpA family N-terminal domain-containing protein	Human	13	4	24	32	17	0.0252282	3	13	1	0
group_4209	type VI secretion system baseplate subunit TssG	Human	13	4	24	32	17	0.0252282	3	13	1	0
group_4310	type VI secretion system contractile sheath small subunit	Human	13	4	24	32	17	0.0252282	3	13	1	0
group_1373	type VI secretion system baseplate subunit TssF	Human	13	4	24	32	17	0.0252282	3	13	1	0
group_4308	type VI secretion system contractile sheath large subunit	Human	13	4	24	32	17	0.0252282	3	13	1	0
group_475	type VI secretion system ATPase TssH	Human	13	4	24	32	17	0.0252282	3	13	1	0
group_4306	Hcp family type VI secretion system effector	Human	13	4	24	32	17	0.0252282	3	13	1	0
group_11168	DUF3289 family protein	Human	13	4	24	32	17	0.0252282	3	13	0	1
group_4304	GPW/gp25 family protein	Human	13	4	24	32	17	0.0252282	3	13	1	0
group_12519	hypothetical protein	Human	18	8	19	28	26	0.02747	4	18	3	1
group_12605	hypothetical protein	Human	8	1	29	35	9	0.0281007	1	8	0	0
group_13023	hypothetical protein	Human	8	1	29	35	9	0.0281007	0	8	1	0
group_12817	organomercurial transporter MerC	Human	8	1	29	35	9	0.0281007	1	8	0	0
group_12789	mercury resistance co-regulator MerD	Human	8	1	29	35	9	0.0281007	1	8	0	0
group_12730	PD-(D/E)XK nuclease-like domain-containing protein	Human	8	1	29	35	9	0.0281007	1	8	0	0
group_9043	stability determinant;hypothetical protein	Human	19	9	18	27	28	0.0301249	9	19	0	0
group_3781	type II toxin-antitoxin system RelE/ParE family toxin;type II toxin-antitoxin system mRNA interferase toxin RelE/StbE family	Human	19	9	18	27	28	0.0301249	9	19	0	0
group_1109	choline BCCT transporter BetT	Human	27	17	10	19	44	0.0322968	15	27	1	1
group_2076	hypothetical protein	Human	21	11	16	25	32	0.0339515	11	21	0	0
group_12317	N-acetylglucosamine-binding protein GbpA	Human	26	16	11	20	42	0.0339515	14	26	1	1
group_12011	hypothetical protein	Human	26	16	11	20	42	0.0339515	14	26	1	1
group_11798	MFS transporter	Human	26	16	11	20	42	0.0339515	14	26	1	1
group_11246	type II secretion system ATPase GspE	Human	26	16	11	20	42	0.0339515	14	26	1	1
group_9513	L-ribulose-5-phosphate 3-epimerase	Human	26	16	11	20	42	0.0339515	14	26	1	1
group_5810	L-ribulose-5-phosphate 4-epimerase	Human	26	16	11	20	42	0.0339515	14	26	1	1
group_12159	general secretion pathway protein GspL	Human	26	16	11	20	42	0.0339515	14	26	1	1
group_11984	type II secretion system minor pseudopilin GspI	Human	26	16	11	20	42	0.0339515	14	26	1	1
group_11759	prepilin-type N-terminal cleavage/methylation domain-containing protein	Human	26	16	11	20	42	0.0339515	14	26	1	1
group_10971	FidL-like protein	Human	26	16	11	20	42	0.0339515	14	26	1	1
group_8896	HTH-type transcriptional regulator UlaR	Human	26	16	11	20	42	0.0339515	14	26	1	1
group_2605	PTS ascorbate transporter subunit IIC	Human	26	16	11	20	42	0.0339515	14	26	1	1
group_12116	type II secretion system minor pseudopilin GspJ	Human	26	16	11	20	42	0.0339515	14	26	1	1
group_11946	A24 family peptidase;prepilin peptidase	Human	26	16	11	20	42	0.0339515	14	26	1	1
group_11658	CadC family transcriptional regulator	Human	26	16	11	20	42	0.0339515	14	26	1	1
group_10737	3-keto-L-gulonate-6-phosphate decarboxylase UlaD	Human	26	16	11	20	42	0.0339515	14	26	1	1
group_8320	PTS ascorbate transporter subunit IIA	Human	26	16	11	20	42	0.0339515	14	26	1	1
group_12093	type II secretion system protein M	Human	26	16	11	20	42	0.0339515	14	26	1	1
group_11935	hypothetical protein;general secretion pathway protein GspC	Human	26	16	11	20	42	0.0339515	14	26	1	1
group_11351	N-acetylmuramoyl-L-alanine amidase AmiA	Human	26	16	11	20	42	0.0339515	14	26	1	1
group_10028	porin	Human	26	16	11	20	42	0.0339515	14	26	1	1
group_6680	PTS ascorbate transporter subunit IIB	Human	26	16	11	20	42	0.0339515	14	26	1	1
group_12041	ABC transporter substrate-binding protein	Human	26	16	11	20	42	0.0339515	14	26	1	1
group_11852	iron ABC transporter permease	Human	26	16	11	20	42	0.0339515	14	26	1	1
group_11247	type II secretion system major pseudopilin GspG	Human	26	16	11	20	42	0.0339515	14	26	1	1
group_9685	type II secretion system inner membrane protein GspF	Human	26	16	11	20	42	0.0339515	14	26	1	1
group_6679	L-ascorbate 6-phosphate lactonase	Human	26	16	11	20	42	0.0339515	14	26	1	1
group_9534	Fic family protein	Human	22	12	15	24	34	0.0350661	12	22	0	0
group_8587	FliC/FljB family flagellin;flagellin FliC	Human	22	12	15	24	34	0.0350661	10	22	2	0
group_5766	MarC family NAAT transporter	Human	11	3	26	33	14	0.0351531	2	11	1	0
group_12639	lipoprotein;hypothetical protein	Human	11	3	26	33	14	0.0351531	1	11	1	1
group_11975	hypothetical protein	Human	11	3	26	33	14	0.0351531	2	11	0	1
group_10128	acyltransferase family protein;acyltransferase	Human	11	3	26	33	14	0.0351531	2	11	1	0
group_7184	O-methyltransferase	Human	11	3	26	33	14	0.0351531	2	11	1	0
group_10350	cupin domain-containing protein	Human	34	26	3	10	60	0.0351531	19	34	4	3
group_7053	Hok/Gef family protein;type I toxin-antitoxin system Hok family toxin	Human	34	26	3	10	60	0.0351531	21	34	4	1
group_11860	sugar glycosyltransferase	Human	24	14	13	22	38	0.0356268	13	24	1	0
group_9192	TIR domain-containing protein;hypothetical protein	Human	24	14	13	22	38	0.0356268	12	24	2	0
group_11836	ABC transporter ATP-binding protein;ATP-binding cassette domain-containing protein	Human	24	14	13	22	38	0.0356268	13	24	1	0
group_11444	iron ABC transporter permease	Human	24	14	13	22	38	0.0356268	13	24	1	0
group_10371	ABC transporter substrate-binding protein	Human	24	14	13	22	38	0.0356268	13	24	1	0
group_11895	substrate-binding domain-containing protein	Human	24	14	13	22	38	0.0356268	13	24	1	0
group_9556	non-ribosomal peptide synthetase	Human	24	14	13	22	38	0.0356268	11	24	1	2
group_12405	NAD(P)H-dependent oxidoreductase	Human	30	21	7	15	51	0.0432872	16	30	3	2
group_10300	PAS domain-containing protein	Human	12	4	25	32	16	0.0459273	3	12	1	0
group_5003	hypothetical protein	Human	12	4	25	32	16	0.0459273	3	12	1	0
group_8840	GNAT family N-acetyltransferase	Human	12	4	25	32	16	0.0459273	3	12	0	1
group_8508	hypothetical protein;TfoX/Sxy family protein	Human	12	4	25	32	16	0.0459273	3	12	1	0
group_5853	hypothetical protein	Human	12	4	25	32	16	0.0459273	3	12	1	0
group_10559	cytochrome P450	Human	12	4	25	32	16	0.0459273	3	12	0	1
group_5727	threo-3-hydroxy-L-aspartate ammonia-lyase	Human	12	4	25	32	16	0.0459273	3	12	1	0
group_10930	hypothetical protein;DUF883 family protein;membrane protein	Human	33	25	4	11	58	0.0459273	19	33	3	3
group_11762	hypothetical protein;phosphoribosylanthranilate isomerase	Human	9	2	28	34	11	0.0462202	0	9	0	2
group_8809	hypothetical protein	Human	9	2	28	34	11	0.0462202	1	9	0	1
group_4381	IS200/IS605 family transposase	Human	9	2	28	34	11	0.0462202	1	9	0	1
group_11716	LLM class flavin-dependent oxidoreductase	Human	9	2	28	34	11	0.0462202	0	9	0	2
group_6729	helix-turn-helix domain-containing protein	Human	9	2	28	34	11	0.0462202	2	9	0	0
group_12882	Y-family DNA polymerase	Human	9	2	28	34	11	0.0462202	2	9	0	0
group_11021	hypothetical protein	Human	9	2	28	34	11	0.0462202	2	9	0	0
group_6226	UbiD family decarboxylase	Human	9	2	28	34	11	0.0462202	0	9	0	2
group_11987	anthranilate phosphoribosyltransferase	Human	9	2	28	34	11	0.0462202	0	9	0	2
group_10019	replicative DNA helicase	Human	9	2	28	34	11	0.0462202	2	9	0	0
group_5440	DNA polymerase III subunit theta	Human	9	2	28	34	11	0.0462202	2	9	0	0
group_11963	cysteine hydrolase	Human	9	2	28	34	11	0.0462202	0	9	0	2
group_9516	hypothetical protein	Human	9	2	28	34	11	0.0462202	1	9	0	1
group_4421	IS6-like element IS26 family transposase	Human	9	2	28	34	11	0.0462202	2	9	0	0
group_11362	TetR/AcrR family transcriptional regulator	Human	35	28	2	8	63	0.0462202	21	35	4	3
group_5883	sugar efflux transporter	Human	35	28	2	8	63	0.0462202	25	35	2	1
group_12732	hypothetical protein	Insect	2	0	2	69	2	0.00228311	0	0	2	0
group_12406	hypothetical protein	Insect	2	0	2	69	2	0.00228311	0	0	2	0
group_3334	hypothetical protein	Insect	2	0	2	69	2	0.00228311	0	0	2	0
group_8872	hypothetical protein	Insect	4	14	0	55	18	0.00281139	2	10	4	2
group_10673	LysR family transcriptional regulator	Insect	4	15	0	54	19	0.00356109	5	8	4	2
group_5758	hypothetical protein	Insect	2	1	2	68	3	0.00672069	1	0	2	0
group_10569	GNAT family N-acetyltransferase	Insect	4	19	0	50	23	0.00813557	6	11	4	2
group_7153	cysteine hydrolase	Insect	3	9	1	60	12	0.0127845	4	3	3	2
group_11680	isochorismatase family protein	Insect	3	9	1	60	12	0.0127845	5	4	3	0
group_10207	FUSC family protein	Insect	3	9	1	60	12	0.0127845	4	3	3	2
group_8250	hypothetical protein	Insect	3	9	1	60	12	0.0127845	5	2	3	2
group_8007	glycosyltransferase;glycosyltransferase family 2 protein	Insect	2	2	2	67	4	0.0131869	1	1	2	0
group_12566	hypothetical protein	Insect	2	2	2	67	4	0.0131869	1	1	2	0
group_6715	ABC transporter permease	Insect	2	2	2	67	4	0.0131869	1	1	2	0
group_10605	dTDP-4-dehydrorhamnose reductase	Insect	2	2	2	67	4	0.0131869	1	1	2	0
group_6649	acyltransferase;acyltransferase family protein	Insect	2	2	2	67	4	0.0131869	1	1	2	0
group_9463	glycosyltransferase	Insect	2	2	2	67	4	0.0131869	1	1	2	0
group_5717	ABC transporter ATP-binding protein	Insect	2	2	2	67	4	0.0131869	1	1	2	0
group_8625	prepilin	Insect	2	2	2	67	4	0.0131869	1	1	2	0
group_10504	UbiX family flavin prenyltransferase	Insect	3	10	1	59	13	0.0164227	3	6	3	1
group_12117	S-type pyocin domain-containing protein	Insect	3	10	1	59	13	0.0164227	5	4	3	1
group_11980	tail fiber domain-containing protein	Insect	3	11	1	58	14	0.0206508	5	5	3	1
group_11485	UbiD family decarboxylase	Insect	3	11	1	58	14	0.0206508	3	7	3	1
group_9170	hypothetical protein	Insect	3	11	1	58	14	0.0206508	8	1	3	2
group_7781	MarR family winged helix-turn-helix transcriptional regulator	Insect	3	11	1	58	14	0.0206508	3	7	3	1
group_12876	glucosyltransferase domain-containing protein	Insect	2	3	2	66	5	0.0215586	1	2	2	0
group_6178	replication associated protein RepA1	Insect	2	3	2	66	5	0.0215586	1	2	2	0
group_12867	glycosyltransferase family 2 protein	Insect	2	3	2	66	5	0.0215586	1	2	2	0
group_6071	TraJ protein;hypothetical protein	Insect	2	3	2	66	5	0.0215586	1	2	2	0
group_12865	GtrA family protein	Insect	2	3	2	66	5	0.0215586	1	2	2	0
group_5077	hypothetical protein	Insect	2	3	2	66	5	0.0215586	1	2	2	0
group_7623	conjugal transfer protein TraO	Insect	2	3	2	66	5	0.0215586	1	2	2	0
group_2317	Flp pilus assembly complex ATPase component TadA	Insect	2	3	2	66	5	0.0215586	1	2	2	0
group_6304	type 4b pilus protein PilO2	Insect	2	3	2	66	5	0.0215586	1	2	2	0
group_10160	DUF4865 family protein	Insect	4	26	0	43	30	0.0251785	13	12	4	1
group_10977	hypothetical protein	Insect	3	12	1	57	15	0.0255	3	8	3	1
group_6268	ABC transporter permease	Insect	3	12	1	57	15	0.0255	6	5	3	1
group_5160	ABC transporter permease	Insect	3	13	1	56	16	0.0309988	6	6	3	1
group_4147	putative FMN-dependent luciferase-like monooxygenase	Insect	3	13	1	56	16	0.0309988	6	6	3	1
group_3721	alkylhydroperoxidase domain protein	Insect	3	13	1	56	16	0.0309988	6	6	3	1
group_8942	isopentenyl-diphosphate Delta-isomerase	Insect	3	13	1	56	16	0.0309988	4	8	3	1
group_1763	ABC transporter ATP-binding protein	Insect	3	13	1	56	16	0.0309988	6	6	3	1
group_7731	hypothetical protein;TIGR04028 family ABC transporter substrate-binding protein	Insect	3	13	1	56	16	0.0309988	6	6	3	1
group_15133	IcmT/TraK family protein	Insect	2	4	2	65	6	0.0317154	1	3	2	0
group_10860	acyltransferase;acyltransferase family protein	Insect	2	4	2	65	6	0.0317154	1	3	2	0
group_8883	relaxase/mobilization nuclease domain-containing protein	Insect	2	4	2	65	6	0.0317154	1	3	2	0
group_8528	conjugal transfer protein TraP	Insect	2	4	2	65	6	0.0317154	1	3	2	0
group_6481	type IV pilus biogenesis protein PilP	Insect	2	4	2	65	6	0.0317154	1	3	2	0
group_5519	TraY domain-containing protein	Insect	2	4	2	65	6	0.0317154	1	3	2	0
group_3368	plasmid transfer ATPase TraJ	Insect	2	4	2	65	6	0.0317154	1	3	2	0
group_1836	PilN family type IVB pilus formation outer membrane protein	Insect	2	4	2	65	6	0.0317154	1	3	2	0
group_14770	DUF6290 family protein	Insect	2	4	2	65	6	0.0317154	1	3	2	0
group_10533	pyrroloquinoline quinone biosynthesis peptide chaperone PqqD	Insect	2	4	2	65	6	0.0317154	2	1	2	1
group_8882	molybdopterin-guanine dinucleotide biosynthesis protein MobC;hypothetical protein	Insect	2	4	2	65	6	0.0317154	1	3	2	0
group_7674	helix-turn-helix domain-containing protein	Insect	2	4	2	65	6	0.0317154	2	1	2	1
group_5978	plasmid IncI1-type surface exclusion protein ExcA	Insect	2	4	2	65	6	0.0317154	1	3	2	0
group_5207	DotI/IcmL/TraM family protein	Insect	2	4	2	65	6	0.0317154	1	3	2	0
group_3221	conjugal transfer protein TraW	Insect	2	4	2	65	6	0.0317154	1	3	2	0
group_898	DotA/TraY family protein	Insect	2	4	2	65	6	0.0317154	1	3	2	0
group_14592	hypothetical protein	Insect	2	4	2	65	6	0.0317154	1	3	2	0
group_10235	DotD/TraH family lipoprotein	Insect	2	4	2	65	6	0.0317154	1	3	2	0
group_8856	DUF5710 domain-containing protein	Insect	2	4	2	65	6	0.0317154	1	3	2	0
group_7206	type IV secretion system DotC family protein	Insect	2	4	2	65	6	0.0317154	1	3	2	0
group_5941	hypothetical protein	Insect	2	4	2	65	6	0.0317154	1	3	2	0
group_4981	AraC family transcriptional regulator	Insect	2	4	2	65	6	0.0317154	2	1	2	1
group_3208	hypothetical protein	Insect	2	4	2	65	6	0.0317154	1	3	2	0
group_782	conjugal transfer protein	Insect	2	4	2	65	6	0.0317154	1	3	2	0
group_13739	type IV pilus biogenesis protein PilM	Insect	2	4	2	65	6	0.0317154	1	3	2	0
group_9588	phospholipase D family protein	Insect	2	4	2	65	6	0.0317154	1	3	2	0
group_8689	toxin co-regulated pilus biosynthesis Q family protein	Insect	2	4	2	65	6	0.0317154	1	3	2	0
group_6611	hydrolase	Insect	2	4	2	65	6	0.0317154	2	1	2	1
group_5940	DsbC family protein	Insect	2	4	2	65	6	0.0317154	1	3	2	0
group_4909	conjugal transfer protein TraX	Insect	2	4	2	65	6	0.0317154	1	3	2	0
group_2533	PQQ-dependent sugar dehydrogenase	Insect	2	4	2	65	6	0.0317154	2	1	2	1
group_267	conjugal transfer protein	Insect	2	4	2	65	6	0.0317154	1	3	2	0
group_12939	conjugal transfer protein TraQ	Insect	2	4	2	65	6	0.0317154	1	3	2	0
group_9173	pyrroloquinoline quinone biosynthesis protein PqqB	Insect	2	4	2	65	6	0.0317154	2	1	2	1
group_8530	hypothetical protein;conjugal transfer protein TraR	Insect	2	4	2	65	6	0.0317154	1	3	2	0
group_6482	type II secretion system F family protein	Insect	2	4	2	65	6	0.0317154	1	3	2	0
group_5761	conjugal transfer protein TraT;conjugal transfer protein	Insect	2	4	2	65	6	0.0317154	1	3	2	0
group_4834	DotH/IcmK family type IV secretion protein	Insect	2	4	2	65	6	0.0317154	1	3	2	0
group_2461	pyrroloquinoline quinone precursor peptide PqqA	Insect	2	4	2	65	6	0.0317154	2	1	2	1
group_11670	HNH endonuclease	Insect	4	28	0	41	32	0.0330384	15	12	4	1
group_5709	MFS transporter	Insect	4	29	0	40	33	0.0375954	16	13	4	0
group_9460	helix-turn-helix transcriptional regulator;helix-turn-helix domain-containing protein	Insect	4	30	0	39	34	0.0426082	17	13	4	0
group_13054	hypothetical protein;DUF2570 domain-containing protein	Insect	2	5	2	64	7	0.0435398	2	2	2	1
group_8626	A24 family peptidase;hypothetical protein	Insect	2	5	2	64	7	0.0435398	2	3	2	0
group_12838	type 1 fimbrial protein	Insect	2	5	2	64	7	0.0435398	3	1	2	1
group_8227	IclR family transcriptional regulator	Insect	2	5	2	64	7	0.0435398	2	1	2	2
group_12468	hypothetical protein	Insect	2	5	2	64	7	0.0435398	3	1	2	1
group_4118	hypothetical protein	Insect	2	5	2	64	7	0.0435398	2	1	2	2
group_15031	hypothetical protein	Insect	2	5	2	64	7	0.0435398	2	2	2	1
group_11464	MFS transporter	Insect	2	5	2	64	7	0.0435398	3	1	2	1
group_3703	MFS transporter	Insect	2	5	2	64	7	0.0435398	2	1	2	2
group_13563	lytic transglycosylase domain-containing protein	Insect	2	5	2	64	7	0.0435398	2	3	2	0
group_10432	alcohol dehydrogenase;hypothetical protein	Insect	2	5	2	64	7	0.0435398	3	1	2	1
group_14292	oxalurate catabolism protein HpxZ	Plant	3	9	0	61	12	0.0035372	1	7	1	3
group_6608	MurR/RpiR family transcriptional regulator	Plant	3	9	0	61	12	0.0035372	1	7	1	3
group_9929	amino acid ABC transporter permease	Plant	3	9	0	61	12	0.0035372	1	7	1	3
group_5486	AtzE family amidohydrolase	Plant	3	9	0	61	12	0.0035372	1	7	1	3
group_9762	amino acid ABC transporter permease	Plant	3	9	0	61	12	0.0035372	1	7	1	3
group_4979	oxalurate catabolism protein HpxX	Plant	3	9	0	61	12	0.0035372	1	7	1	3
group_8283	amino acid ABC transporter ATP-binding protein	Plant	3	9	0	61	12	0.0035372	1	7	1	3
group_1951	gamma-glutamyltransferase family protein	Plant	3	9	0	61	12	0.0035372	1	7	1	3
group_7411	transporter substrate-binding domain-containing protein	Plant	3	9	0	61	12	0.0035372	1	7	1	3
group_10515	hydrolase	Plant	2	2	1	68	4	0.00672069	0	1	1	2
group_5382	nuclear transport factor 2 family protein	Plant	2	2	1	68	4	0.00672069	0	1	1	2
group_9348	hypothetical protein	Plant	2	2	1	68	4	0.00672069	0	1	1	2
group_5282	hypothetical protein	Plant	2	2	1	68	4	0.00672069	1	1	0	2
group_7028	zinc ribbon domain-containing protein	Plant	2	2	1	68	4	0.00672069	0	2	0	2
group_5600	helix-turn-helix transcriptional regulator;AraC family transcriptional regulator	Plant	2	2	1	68	4	0.00672069	0	1	1	2
group_12045	NAD(P)H-dependent oxidoreductase	Plant	2	2	1	68	4	0.00672069	0	1	1	2
group_5383	LysR family transcriptional regulator	Plant	2	2	1	68	4	0.00672069	0	1	1	2
group_11434	glucosamine-6-phosphate deaminase	Plant	3	12	0	58	15	0.00731558	4	7	1	3
group_4307	type VI secretion system contractile sheath large subunit	Plant	3	13	0	57	16	0.00900379	4	7	2	3
group_474	type VI secretion system ATPase TssH	Plant	3	13	0	57	16	0.00900379	4	7	2	3
group_4305	Hcp family type VI secretion system effector	Plant	3	13	0	57	16	0.00900379	4	7	2	3
group_4303	GPW/gp25 family protein	Plant	3	13	0	57	16	0.00900379	4	7	2	3
group_5017	type VI secretion system ImpA family N-terminal domain-containing protein	Plant	3	13	0	57	16	0.00900379	4	7	2	3
group_4207	type VI secretion system baseplate subunit TssG	Plant	3	13	0	57	16	0.00900379	4	7	2	3
group_4309	type VI secretion system contractile sheath small subunit	Plant	3	13	0	57	16	0.00900379	4	7	2	3
group_1371	type VI secretion system baseplate subunit TssF	Plant	3	13	0	57	16	0.00900379	4	7	2	3
group_142	type VI secretion system membrane subunit TssM	Plant	3	14	0	56	17	0.0109332	4	8	2	3
group_12926	tyrosine-type recombinase/integrase	Plant	2	3	1	67	5	0.011094	0	2	1	2
group_5098	hypothetical protein	Plant	2	3	1	67	5	0.011094	1	1	1	2
group_13456	benzoate 12-dioxygenase small subunit	Plant	2	4	1	66	6	0.0164802	2	1	1	2
group_7602	acyltransferase family protein	Plant	2	4	1	66	6	0.0164802	2	1	1	2
group_3243	3-oxoadipyl-CoA thiolase	Plant	2	4	1	66	6	0.0164802	2	1	1	2
group_9507	3-oxoacid CoA-transferase subunit B	Plant	2	4	1	66	6	0.0164802	2	1	1	2
group_7556	16-dihydroxycyclohexa-24-diene-1-carboxylate dehydrogenase	Plant	2	4	1	66	6	0.0164802	2	1	1	2
group_2653	Rieske 2Fe-2S domain-containing protein	Plant	2	4	1	66	6	0.0164802	2	1	1	2
group_9409	3-oxoacid CoA-transferase subunit A	Plant	2	4	1	66	6	0.0164802	2	1	1	2
group_6698	helix-turn-helix domain-containing protein	Plant	2	4	1	66	6	0.0164802	2	1	1	2
group_8074	ring-hydroxylating dioxygenase ferredoxin reductase family protein	Plant	2	4	1	66	6	0.0164802	2	1	1	2
group_5260	catechol 12-dioxygenase	Plant	2	4	1	66	6	0.0164802	2	1	1	2
group_15106	muconolactone Delta-isomerase	Plant	2	4	1	66	6	0.0164802	2	1	1	2
group_7947	3-oxoadipate enol-lactonase	Plant	2	4	1	66	6	0.0164802	2	1	1	2
group_3710	muconate cycloisomerase family protein	Plant	2	4	1	66	6	0.0164802	2	1	1	2
group_12905	phage integrase Arm DNA-binding domain-containing protein	Plant	2	5	1	65	7	0.0228471	2	2	1	2
group_8227	IclR family transcriptional regulator	Plant	2	5	1	65	7	0.0228471	2	1	2	2
group_4118	hypothetical protein	Plant	2	5	1	65	7	0.0228471	2	1	2	2
group_3703	MFS transporter	Plant	2	5	1	65	7	0.0228471	2	1	2	2
group_12906	excisionase	Plant	2	5	1	65	7	0.0228471	2	2	1	2
group_10449	HigA family addiction module antidote protein	Plant	3	19	0	51	22	0.0247604	10	7	2	3
group_10400	hypothetical protein	Plant	2	6	1	64	8	0.0301627	3	3	0	2
group_6603	glycosyltransferase family 4 protein;glycosyltransferase;hypothetical protein	Plant	2	6	1	64	8	0.0301627	3	3	0	2
group_4294	pyrroloquinoline quinone biosynthesis protein PqqE	Plant	2	6	1	64	8	0.0301627	3	1	2	2
group_14106	type II toxin-antitoxin system HicB family antitoxin	Plant	2	6	1	64	8	0.0301627	3	1	2	2
group_9956	phosphoribosyltransferase;hypothetical protein	Plant	2	6	1	64	8	0.0301627	3	3	0	2
group_5958	glycosyltransferase family 4 protein	Plant	2	6	1	64	8	0.0301627	3	3	0	2
group_3881	glycosyltransferase	Plant	2	6	1	64	8	0.0301627	3	3	0	2
group_11830	winged helix-turn-helix domain-containing protein	Plant	2	6	1	64	8	0.0301627	3	1	2	2
group_9600	hypothetical protein	Plant	2	6	1	64	8	0.0301627	3	3	0	2
group_5597	HARLDQ motif MBL-fold protein	Plant	2	6	1	64	8	0.0301627	3	1	2	2
group_3206	MFS transporter	Plant	2	6	1	64	8	0.0301627	3	1	2	2
group_11327	haloacid dehalogenase-like hydrolase;hypothetical protein	Plant	2	6	1	64	8	0.0301627	3	3	0	2
group_8458	aromatic acid/H+ symport family MFS transporter;MFS transporter	Plant	2	6	1	64	8	0.0301627	4	1	1	2
group_5561	LysR family transcriptional regulator	Plant	2	6	1	64	8	0.0301627	3	1	2	2
group_2511	undecaprenyl-phosphate galactose phosphotransferase WbaP	Plant	2	6	1	64	8	0.0301627	3	3	0	2
group_10797	LysR family transcriptional regulator	Plant	2	6	1	64	8	0.0301627	4	1	1	2
group_7397	glycosyltransferase family 4 protein	Plant	2	6	1	64	8	0.0301627	3	3	0	2
group_5105	LysR family transcriptional regulator	Plant	2	6	1	64	8	0.0301627	3	1	2	2
group_1694	type II toxin-antitoxin system HicA family toxin	Plant	2	6	1	64	8	0.0301627	3	1	2	2
group_10919	hypothetical protein;exopolysaccharide biosynthesis protein	Plant	3	21	0	49	24	0.0325423	6	14	1	3
group_8683	hypothetical protein;right-handed parallel beta-helix repeat-containing protein	Plant	3	21	0	49	24	0.0325423	5	16	0	3
group_10881	helix-turn-helix transcriptional regulator	Plant	3	22	0	48	25	0.0369799	9	11	2	3
group_12611	hypothetical protein	Plant	3	22	0	48	25	0.0369799	9	11	2	3
group_11622	4-oxalocrotonate tautomerase family protein;tautomerase family protein	Plant	3	22	0	48	25	0.0369799	9	11	2	3
group_12649	type 1 fimbrial protein	Plant	2	7	1	63	9	0.0383948	4	1	2	2
group_9684	fimbria/pilus periplasmic chaperone	Plant	2	7	1	63	9	0.0383948	4	1	2	2
group_12807	type 1 fimbrial protein	Plant	2	7	1	63	9	0.0383948	4	1	2	2
group_5849	SDR family NAD(P)-dependent oxidoreductase	Plant	2	7	1	63	9	0.0383948	4	1	2	2
group_12754	outer membrane usher protein	Plant	2	7	1	63	9	0.0383948	4	1	2	2
group_5726	serine acetyltransferase	Plant	2	7	1	63	9	0.0383948	4	3	0	2
group_12753	type 1 fimbrial protein	Plant	2	7	1	63	9	0.0383948	4	1	2	2
group_4182	alcohol dehydrogenase catalytic domain-containing protein	Plant	2	7	1	63	9	0.0383948	4	1	2	2
group_15131	hypothetical protein	Plant	1	0	2	70	1	0.0410959	0	0	0	1
group_14864	hypothetical protein	Plant	1	0	2	70	1	0.0410959	0	0	0	1
group_14591	DUF1870 family protein	Plant	1	0	2	70	1	0.0410959	0	0	0	1
group_14395	hypothetical protein	Plant	1	0	2	70	1	0.0410959	0	0	0	1
group_14341	lysozyme inhibitor LprI family protein	Plant	1	0	2	70	1	0.0410959	0	0	0	1
group_14173	hypothetical protein	Plant	1	0	2	70	1	0.0410959	0	0	0	1
group_14092	type II toxin-antitoxin system VapC family toxin	Plant	1	0	2	70	1	0.0410959	0	0	0	1
group_13882	hypothetical protein	Plant	1	0	2	70	1	0.0410959	0	0	0	1
group_13828	hypothetical protein	Plant	1	0	2	70	1	0.0410959	0	0	0	1
group_13667	DMT family transporter	Plant	1	0	2	70	1	0.0410959	0	0	0	1
group_13562	HNH endonuclease	Plant	1	0	2	70	1	0.0410959	0	0	0	1
group_13438	MgtC/SapB family protein	Plant	1	0	2	70	1	0.0410959	0	0	0	1
group_13219	spore coat U domain-containing protein	Plant	1	0	2	70	1	0.0410959	0	0	0	1
group_12645	hypothetical protein	Plant	1	0	2	70	1	0.0410959	0	0	0	1
group_12373	LuxR C-terminal-related transcriptional regulator	Plant	1	0	2	70	1	0.0410959	0	0	0	1
group_11934	tyrosine-type recombinase/integrase	Plant	1	0	2	70	1	0.0410959	0	0	0	1
group_10910	NAD(P)H-dependent oxidoreductase	Plant	1	0	2	70	1	0.0410959	0	0	0	1
group_10363	hypothetical protein	Plant	1	0	2	70	1	0.0410959	0	0	0	1
group_9884	type 1 fimbrial protein	Plant	1	0	2	70	1	0.0410959	0	0	0	1
group_8237	tyrosine-type recombinase/integrase	Plant	1	0	2	70	1	0.0410959	0	0	0	1
group_7694	MipA/OmpV family protein	Plant	1	0	2	70	1	0.0410959	0	0	0	1
group_7131	hypothetical protein	Plant	1	0	2	70	1	0.0410959	0	0	0	1
group_6332	hypothetical protein	Plant	1	0	2	70	1	0.0410959	0	0	0	1
group_5850	hypothetical protein	Plant	1	0	2	70	1	0.0410959	0	0	0	1
group_5483	hypothetical protein	Plant	1	0	2	70	1	0.0410959	0	0	0	1
group_5268	hypothetical protein	Plant	1	0	2	70	1	0.0410959	0	0	0	1
group_5053	hypothetical protein	Plant	1	0	2	70	1	0.0410959	0	0	0	1
group_4635	hypothetical protein	Plant	1	0	2	70	1	0.0410959	0	0	0	1
group_3700	linear amide C-N hydrolase	Plant	1	0	2	70	1	0.0410959	0	0	0	1
group_3503	reverse transcriptase family protein	Plant	1	0	2	70	1	0.0410959	0	0	0	1
group_3207	FRG domain-containing protein	Plant	1	0	2	70	1	0.0410959	0	0	0	1
group_2726	phage tail sheath family protein	Plant	1	0	2	70	1	0.0410959	0	0	0	1
group_2607	amidohydrolase family protein	Plant	1	0	2	70	1	0.0410959	0	0	0	1
group_2373	hypothetical protein	Plant	1	0	2	70	1	0.0410959	0	0	0	1
group_2305	hypothetical protein	Plant	1	0	2	70	1	0.0410959	0	0	0	1
group_2226	type IV toxin-antitoxin system YeeU family antitoxin	Plant	1	0	2	70	1	0.0410959	0	0	0	1
group_2164	DUF5908 family protein	Plant	1	0	2	70	1	0.0410959	0	0	0	1
group_1998	hypothetical protein	Plant	1	0	2	70	1	0.0410959	0	0	0	1
group_1711	ANR family transcriptional regulator	Plant	1	0	2	70	1	0.0410959	0	0	0	1
group_1568	ANR family transcriptional regulator	Plant	1	0	2	70	1	0.0410959	0	0	0	1
group_1266	DUF262 domain-containing HNH endonuclease family protein	Plant	1	0	2	70	1	0.0410959	0	0	0	1
group_1085	ATP-binding protein	Plant	1	0	2	70	1	0.0410959	0	0	0	1
group_964	hypothetical protein	Plant	1	0	2	70	1	0.0410959	0	0	0	1
group_828	hypothetical protein	Plant	1	0	2	70	1	0.0410959	0	0	0	1
group_670	site-specific integrase	Plant	1	0	2	70	1	0.0410959	0	0	0	1
group_521	DEAD/DEAH box helicase	Plant	1	0	2	70	1	0.0410959	0	0	0	1
group_278	hypothetical protein	Plant	1	0	2	70	1	0.0410959	0	0	0	1
group_74	PAAR domain-containing protein	Plant	1	0	2	70	1	0.0410959	0	0	0	1
group_16	inverse autotransporter beta domain-containing protein	Plant	1	0	2	70	1	0.0410959	0	0	0	1
group_15083	hypothetical protein	Plant	1	0	2	70	1	0.0410959	0	0	0	1
group_14823	hypothetical protein	Plant	1	0	2	70	1	0.0410959	0	0	0	1
group_14562	phage holin family protein	Plant	1	0	2	70	1	0.0410959	0	0	0	1
group_14394	hypothetical protein	Plant	1	0	2	70	1	0.0410959	0	0	0	1
group_14314	type II toxin-antitoxin system prevent-host-death family antitoxin	Plant	1	0	2	70	1	0.0410959	0	0	0	1
group_14171	hypothetical protein	Plant	1	0	2	70	1	0.0410959	0	0	0	1
group_14060	tail fiber assembly protein	Plant	1	0	2	70	1	0.0410959	0	0	0	1
group_13866	hypothetical protein	Plant	1	0	2	70	1	0.0410959	0	0	0	1
group_13759	phage tail protein	Plant	1	0	2	70	1	0.0410959	0	0	0	1
group_13640	hypothetical protein	Plant	1	0	2	70	1	0.0410959	0	0	0	1
group_13534	hypothetical protein	Plant	1	0	2	70	1	0.0410959	0	0	0	1
group_13412	fimbrial protein	Plant	1	0	2	70	1	0.0410959	0	0	0	1
group_13197	hypothetical protein	Plant	1	0	2	70	1	0.0410959	0	0	0	1
group_12558	hypothetical protein	Plant	1	0	2	70	1	0.0410959	0	0	0	1
group_12370	hypothetical protein	Plant	1	0	2	70	1	0.0410959	0	0	0	1
group_11580	LuxR C-terminal-related transcriptional regulator	Plant	1	0	2	70	1	0.0410959	0	0	0	1
group_10774	TIGR02646 family protein	Plant	1	0	2	70	1	0.0410959	0	0	0	1
group_10172	hypothetical protein	Plant	1	0	2	70	1	0.0410959	0	0	0	1
group_9820	VUT family protein	Plant	1	0	2	70	1	0.0410959	0	0	0	1
group_8170	hypothetical protein	Plant	1	0	2	70	1	0.0410959	0	0	0	1
group_7520	fimbria/pilus periplasmic chaperone	Plant	1	0	2	70	1	0.0410959	0	0	0	1
group_6792	DUF2971 domain-containing protein	Plant	1	0	2	70	1	0.0410959	0	0	0	1
group_6329	hypothetical protein	Plant	1	0	2	70	1	0.0410959	0	0	0	1
group_5628	DUF1837 domain-containing protein	Plant	1	0	2	70	1	0.0410959	0	0	0	1
group_5447	RNA-directed DNA polymerase	Plant	1	0	2	70	1	0.0410959	0	0	0	1
group_5241	spore coat U domain-containing protein	Plant	1	0	2	70	1	0.0410959	0	0	0	1
group_5022	ParB/RepB/Spo0J family plasmid partition protein	Plant	1	0	2	70	1	0.0410959	0	0	0	1
group_4160	hypothetical protein	Plant	1	0	2	70	1	0.0410959	0	0	0	1
group_3693	XRE family transcriptional regulator	Plant	1	0	2	70	1	0.0410959	0	0	0	1
group_3498	plasmid-partitioning protein SopA	Plant	1	0	2	70	1	0.0410959	0	0	0	1
group_3068	phage tail sheath subtilisin-like domain-containing protein	Plant	1	0	2	70	1	0.0410959	0	0	0	1
group_2641	hypothetical protein	Plant	1	0	2	70	1	0.0410959	0	0	0	1
group_2596	hypothetical protein	Plant	1	0	2	70	1	0.0410959	0	0	0	1
group_2348	hypothetical protein	Plant	1	0	2	70	1	0.0410959	0	0	0	1
group_2302	isocitrate dehydrogenase	Plant	1	0	2	70	1	0.0410959	0	0	0	1
group_2202	transposase	Plant	1	0	2	70	1	0.0410959	0	0	0	1
group_2119	hypothetical protein	Plant	1	0	2	70	1	0.0410959	0	0	0	1
group_1953	hypothetical protein	Plant	1	0	2	70	1	0.0410959	0	0	0	1
group_1706	DUF551 domain-containing protein	Plant	1	0	2	70	1	0.0410959	0	0	0	1
group_1484	SGNH/GDSL hydrolase family protein	Plant	1	0	2	70	1	0.0410959	0	0	0	1
group_1191	hypothetical protein	Plant	1	0	2	70	1	0.0410959	0	0	0	1
group_1074	hypothetical protein	Plant	1	0	2	70	1	0.0410959	0	0	0	1
group_939	hypothetical protein	Plant	1	0	2	70	1	0.0410959	0	0	0	1
group_825	helix-turn-helix domain-containing protein	Plant	1	0	2	70	1	0.0410959	0	0	0	1
group_669	helix-turn-helix domain-containing protein	Plant	1	0	2	70	1	0.0410959	0	0	0	1
group_506	outer membrane usher protein	Plant	1	0	2	70	1	0.0410959	0	0	0	1
group_223	hypothetical protein	Plant	1	0	2	70	1	0.0410959	0	0	0	1
group_51	hypothetical protein	Plant	1	0	2	70	1	0.0410959	0	0	0	1
group_14919	hypothetical protein	Plant	1	0	2	70	1	0.0410959	0	0	0	1
group_14766	hypothetical protein	Plant	1	0	2	70	1	0.0410959	0	0	0	1
group_14486	hypothetical protein	Plant	1	0	2	70	1	0.0410959	0	0	0	1
group_14372	serine hydrolase	Plant	1	0	2	70	1	0.0410959	0	0	0	1
group_14313	DUF2570 domain-containing protein	Plant	1	0	2	70	1	0.0410959	0	0	0	1
group_14146	IS66 family insertion sequence hypothetical protein	Plant	1	0	2	70	1	0.0410959	0	0	0	1
group_14002	hypothetical protein	Plant	1	0	2	70	1	0.0410959	0	0	0	1
group_13865	hypothetical protein	Plant	1	0	2	70	1	0.0410959	0	0	0	1
group_13758	hypothetical protein	Plant	1	0	2	70	1	0.0410959	0	0	0	1
group_13616	DNA repair protein RadC	Plant	1	0	2	70	1	0.0410959	0	0	0	1
group_13524	type 1 fimbrial protein	Plant	1	0	2	70	1	0.0410959	0	0	0	1
group_13411	spore coat U domain-containing protein	Plant	1	0	2	70	1	0.0410959	0	0	0	1
group_12880	replication initiation protein	Plant	1	0	2	70	1	0.0410959	0	0	0	1
group_12456	type 1 fimbrial protein	Plant	1	0	2	70	1	0.0410959	0	0	0	1
group_12288	fimbrial protein	Plant	1	0	2	70	1	0.0410959	0	0	0	1
group_11084	class I SAM-dependent methyltransferase	Plant	1	0	2	70	1	0.0410959	0	0	0	1
group_10517	glutathione S-transferase N-terminal domain-containing protein	Plant	1	0	2	70	1	0.0410959	0	0	0	1
group_10098	helix-turn-helix domain-containing protein	Plant	1	0	2	70	1	0.0410959	0	0	0	1
group_9364	response regulator transcription factor	Plant	1	0	2	70	1	0.0410959	0	0	0	1
group_7909	molecular chaperone	Plant	1	0	2	70	1	0.0410959	0	0	0	1
group_7353	helix-turn-helix transcriptional regulator	Plant	1	0	2	70	1	0.0410959	0	0	0	1
group_6689	hypothetical protein	Plant	1	0	2	70	1	0.0410959	0	0	0	1
group_6134	WYL domain-containing protein	Plant	1	0	2	70	1	0.0410959	0	0	0	1
group_5605	Pvc16 family protein	Plant	1	0	2	70	1	0.0410959	0	0	0	1
group_5385	LysR family transcriptional regulator	Plant	1	0	2	70	1	0.0410959	0	0	0	1
group_5228	Ig-like domain-containing protein	Plant	1	0	2	70	1	0.0410959	0	0	0	1
group_4989	PD-(D/E)XK motif protein	Plant	1	0	2	70	1	0.0410959	0	0	0	1
group_4034	hypothetical protein	Plant	1	0	2	70	1	0.0410959	0	0	0	1
group_3634	DNA cytosine methyltransferase	Plant	1	0	2	70	1	0.0410959	0	0	0	1
group_3497	restriction endonuclease subunit S	Plant	1	0	2	70	1	0.0410959	0	0	0	1
group_3034	hypothetical protein	Plant	1	0	2	70	1	0.0410959	0	0	0	1
group_2637	IS3 family transposase	Plant	1	0	2	70	1	0.0410959	0	0	0	1
group_2584	DUF2971 domain-containing protein	Plant	1	0	2	70	1	0.0410959	0	0	0	1
group_2336	hypothetical protein	Plant	1	0	2	70	1	0.0410959	0	0	0	1
group_2282	hypothetical protein	Plant	1	0	2	70	1	0.0410959	0	0	0	1
group_2176	hypothetical protein	Plant	1	0	2	70	1	0.0410959	0	0	0	1
group_2077	IS66 family transposase	Plant	1	0	2	70	1	0.0410959	0	0	0	1
group_1862	hypothetical protein	Plant	1	0	2	70	1	0.0410959	0	0	0	1
group_1662	hypothetical protein	Plant	1	0	2	70	1	0.0410959	0	0	0	1
group_1472	hypothetical protein	Plant	1	0	2	70	1	0.0410959	0	0	0	1
group_1190	NACHT domain-containing protein	Plant	1	0	2	70	1	0.0410959	0	0	0	1
group_1055	hypothetical protein	Plant	1	0	2	70	1	0.0410959	0	0	0	1
group_914	hypothetical protein	Plant	1	0	2	70	1	0.0410959	0	0	0	1
group_813	phage baseplate assembly protein V	Plant	1	0	2	70	1	0.0410959	0	0	0	1
group_644	colicin-D	Plant	1	0	2	70	1	0.0410959	0	0	0	1
group_386	Z1 domain-containing protein	Plant	1	0	2	70	1	0.0410959	0	0	0	1
group_193	hypothetical protein	Plant	1	0	2	70	1	0.0410959	0	0	0	1
group_43	hypothetical protein	Plant	1	0	2	70	1	0.0410959	0	0	0	1
group_14897	hypothetical protein	Plant	1	0	2	70	1	0.0410959	0	0	0	1
group_14721	hypothetical protein	Plant	1	0	2	70	1	0.0410959	0	0	0	1
group_14461	TA system toxin CbtA family protein	Plant	1	0	2	70	1	0.0410959	0	0	0	1
group_14368	adenylyltransferase/cytidyltransferase family protein	Plant	1	0	2	70	1	0.0410959	0	0	0	1
group_14262	M15 family metallopeptidase	Plant	1	0	2	70	1	0.0410959	0	0	0	1
group_14132	DoxX family protein	Plant	1	0	2	70	1	0.0410959	0	0	0	1
group_14001	hypothetical protein	Plant	1	0	2	70	1	0.0410959	0	0	0	1
group_13848	phage tail protein	Plant	1	0	2	70	1	0.0410959	0	0	0	1
group_13713	carbohydrate binding domain-containing protein	Plant	1	0	2	70	1	0.0410959	0	0	0	1
group_13593	hypothetical protein	Plant	1	0	2	70	1	0.0410959	0	0	0	1
group_13507	class I SAM-dependent methyltransferase	Plant	1	0	2	70	1	0.0410959	0	0	0	1
group_13374	fimbrial protein	Plant	1	0	2	70	1	0.0410959	0	0	0	1
group_12860	GNAT family N-acetyltransferase	Plant	1	0	2	70	1	0.0410959	0	0	0	1
group_12449	tyrosine-type recombinase/integrase	Plant	1	0	2	70	1	0.0410959	0	0	0	1
group_12054	disulfide bond formation protein B	Plant	1	0	2	70	1	0.0410959	0	0	0	1
group_10973	DUF2913 family protein	Plant	1	0	2	70	1	0.0410959	0	0	0	1
group_10511	hypothetical protein	Plant	1	0	2	70	1	0.0410959	0	0	0	1
group_10091	hypothetical protein	Plant	1	0	2	70	1	0.0410959	0	0	0	1
group_8540	metallophosphoesterase	Plant	1	0	2	70	1	0.0410959	0	0	0	1
group_7809	phosphotransferase	Plant	1	0	2	70	1	0.0410959	0	0	0	1
group_7189	winged helix-turn-helix domain-containing protein	Plant	1	0	2	70	1	0.0410959	0	0	0	1
group_6665	DUF4942 domain-containing protein	Plant	1	0	2	70	1	0.0410959	0	0	0	1
group_6038	hypothetical protein	Plant	1	0	2	70	1	0.0410959	0	0	0	1
group_5591	hypothetical protein	Plant	1	0	2	70	1	0.0410959	0	0	0	1
group_5290	hypothetical protein	Plant	1	0	2	70	1	0.0410959	0	0	0	1
group_5189	hypothetical protein	Plant	1	0	2	70	1	0.0410959	0	0	0	1
group_4969	DUF4747 family protein	Plant	1	0	2	70	1	0.0410959	0	0	0	1
group_3789	hypothetical protein	Plant	1	0	2	70	1	0.0410959	0	0	0	1
group_3630	phage tail sheath subtilisin-like domain-containing protein	Plant	1	0	2	70	1	0.0410959	0	0	0	1
group_3477	HAMP domain-containing histidine kinase	Plant	1	0	2	70	1	0.0410959	0	0	0	1
group_2986	AAA family ATPase	Plant	1	0	2	70	1	0.0410959	0	0	0	1
group_2636	IS3 family transposase	Plant	1	0	2	70	1	0.0410959	0	0	0	1
group_2583	hypothetical protein	Plant	1	0	2	70	1	0.0410959	0	0	0	1
group_2330	hypothetical protein	Plant	1	0	2	70	1	0.0410959	0	0	0	1
group_2268	DUF5993 family protein	Plant	1	0	2	70	1	0.0410959	0	0	0	1
group_2166	hypothetical protein	Plant	1	0	2	70	1	0.0410959	0	0	0	1
group_2036	hypothetical protein	Plant	1	0	2	70	1	0.0410959	0	0	0	1
group_1845	Ig-like domain-containing protein	Plant	1	0	2	70	1	0.0410959	0	0	0	1
group_1660	hypothetical protein	Plant	1	0	2	70	1	0.0410959	0	0	0	1
group_1364	toxin	Plant	1	0	2	70	1	0.0410959	0	0	0	1
group_1126	type II toxin-antitoxin system VapB family antitoxin	Plant	1	0	2	70	1	0.0410959	0	0	0	1
group_1012	AIPR family protein	Plant	1	0	2	70	1	0.0410959	0	0	0	1
group_886	type II toxin-antitoxin system ParD family antitoxin	Plant	1	0	2	70	1	0.0410959	0	0	0	1
group_738	hypothetical protein	Plant	1	0	2	70	1	0.0410959	0	0	0	1
group_539	fimbria/pilus outer membrane usher protein	Plant	1	0	2	70	1	0.0410959	0	0	0	1
group_379	hypothetical protein	Plant	1	0	2	70	1	0.0410959	0	0	0	1
group_136	IS66 family insertion sequence element accessory protein TnpB	Plant	1	0	2	70	1	0.0410959	0	0	0	1
group_38	hypothetical protein	Plant	1	0	2	70	1	0.0410959	0	0	0	1
group_14895	hypothetical protein	Plant	1	0	2	70	1	0.0410959	0	0	0	1
group_14679	hypothetical protein	Plant	1	0	2	70	1	0.0410959	0	0	0	1
group_14445	hypothetical protein	Plant	1	0	2	70	1	0.0410959	0	0	0	1
group_14356	hypothetical protein	Plant	1	0	2	70	1	0.0410959	0	0	0	1
group_14199	hypothetical protein	Plant	1	0	2	70	1	0.0410959	0	0	0	1
group_14131	type II toxin-antitoxin system death-on-curing family toxin	Plant	1	0	2	70	1	0.0410959	0	0	0	1
group_13975	DUF1795 domain-containing protein	Plant	1	0	2	70	1	0.0410959	0	0	0	1
group_13829	GPW/gp25 family protein	Plant	1	0	2	70	1	0.0410959	0	0	0	1
group_13668	antirestriction protein	Plant	1	0	2	70	1	0.0410959	0	0	0	1
group_13592	hypothetical protein	Plant	1	0	2	70	1	0.0410959	0	0	0	1
group_13439	fimbrial protein	Plant	1	0	2	70	1	0.0410959	0	0	0	1
group_13276	S-type pyocin domain-containing protein	Plant	1	0	2	70	1	0.0410959	0	0	0	1
group_12774	type 1 fimbrial protein	Plant	1	0	2	70	1	0.0410959	0	0	0	1
group_12448	spore coat U domain-containing protein	Plant	1	0	2	70	1	0.0410959	0	0	0	1
group_12047	hypothetical protein	Plant	1	0	2	70	1	0.0410959	0	0	0	1
group_10972	helix-turn-helix domain-containing protein	Plant	1	0	2	70	1	0.0410959	0	0	0	1
group_10440	hypothetical protein	Plant	1	0	2	70	1	0.0410959	0	0	0	1
group_9885	hypothetical protein	Plant	1	0	2	70	1	0.0410959	0	0	0	1
group_8506	SLATT domain-containing protein	Plant	1	0	2	70	1	0.0410959	0	0	0	1
group_7746	GntR family transcriptional regulator	Plant	1	0	2	70	1	0.0410959	0	0	0	1
group_7187	hypothetical protein	Plant	1	0	2	70	1	0.0410959	0	0	0	1
group_6361	hypothetical protein	Plant	1	0	2	70	1	0.0410959	0	0	0	1
group_6005	hypothetical protein	Plant	1	0	2	70	1	0.0410959	0	0	0	1
group_5527	LysR family transcriptional regulator	Plant	1	0	2	70	1	0.0410959	0	0	0	1
group_5289	hypothetical protein	Plant	1	0	2	70	1	0.0410959	0	0	0	1
group_5061	VirK/YbjX family protein	Plant	1	0	2	70	1	0.0410959	0	0	0	1
group_4902	DUF4238 domain-containing protein	Plant	1	0	2	70	1	0.0410959	0	0	0	1
group_3754	hypothetical protein	Plant	1	0	2	70	1	0.0410959	0	0	0	1
group_3629	hypothetical protein	Plant	1	0	2	70	1	0.0410959	0	0	0	1
group_3307	MFS transporter	Plant	1	0	2	70	1	0.0410959	0	0	0	1
group_2913	AAA family ATPase	Plant	1	0	2	70	1	0.0410959	0	0	0	1
group_2608	N-acetylglucosamine-specific PTS transporter subunit IIBC	Plant	1	0	2	70	1	0.0410959	0	0	0	1
group_2446	ATP-binding protein	Plant	1	0	2	70	1	0.0410959	0	0	0	1
group_2322	hypothetical protein	Plant	1	0	2	70	1	0.0410959	0	0	0	1
group_2245	hypothetical protein	Plant	1	0	2	70	1	0.0410959	0	0	0	1
group_2165	hypothetical protein	Plant	1	0	2	70	1	0.0410959	0	0	0	1
group_2035	hypothetical protein	Plant	1	0	2	70	1	0.0410959	0	0	0	1
group_1812	TraY domain-containing protein	Plant	1	0	2	70	1	0.0410959	0	0	0	1
group_1616	hypothetical protein	Plant	1	0	2	70	1	0.0410959	0	0	0	1
group_1271	phage tail tape measure protein	Plant	1	0	2	70	1	0.0410959	0	0	0	1
group_1094	lytic transglycosylase domain-containing protein	Plant	1	0	2	70	1	0.0410959	0	0	0	1
group_990	AAA family ATPase	Plant	1	0	2	70	1	0.0410959	0	0	0	1
group_882	hypothetical protein	Plant	1	0	2	70	1	0.0410959	0	0	0	1
group_698	antitoxin	Plant	1	0	2	70	1	0.0410959	0	0	0	1
group_536	hypothetical protein	Plant	1	0	2	70	1	0.0410959	0	0	0	1
group_378	inverse autotransporter beta domain-containing protein	Plant	1	0	2	70	1	0.0410959	0	0	0	1
group_113	hypothetical protein	Plant	1	0	2	70	1	0.0410959	0	0	0	1
group_22	hypothetical protein	Plant	1	0	2	70	1	0.0410959	0	0	0	1
group_11931	hypothetical protein	Plant	3	24	0	46	27	0.0470287	7	14	3	3
group_11687	hypothetical protein	Plant	3	24	0	46	27	0.0470287	5	16	3	3
group_11043	HlyD family secretion protein	Plant	3	24	0	46	27	0.0470287	5	16	3	3
group_8341	LysE family translocator;LysE family transporter	Plant	3	24	0	46	27	0.0470287	7	16	1	3
group_12095	fimbrial biogenesis outer membrane usher protein	Plant	3	24	0	46	27	0.0470287	6	15	3	3
group_455	fimbrial biogenesis outer membrane usher protein	Plant	3	24	0	46	27	0.0470287	14	8	2	3
group_10640	hypothetical protein	Plant	2	8	1	62	10	0.0475111	3	4	1	2
group_5280	alpha-E domain-containing protein	Plant	2	8	1	62	10	0.0475111	3	3	2	2
group_12464	hypothetical protein	Plant	2	8	1	62	10	0.0475111	5	1	2	2
group_9321	MerR family transcriptional regulator	Plant	2	8	1	62	10	0.0475111	4	3	1	2
group_2500	circularly permuted type 2 ATP-grasp protein	Plant	2	8	1	62	10	0.0475111	3	3	2	2
group_12443	hypothetical protein	Plant	2	8	1	62	10	0.0475111	5	1	2	2
group_9195	hypothetical protein	Plant	2	8	1	62	10	0.0475111	3	3	2	2
group_1639	urocanate hydratase	Plant	2	8	1	62	10	0.0475111	0	8	0	2
group_12425	winged helix-turn-helix domain-containing protein	Plant	2	8	1	62	10	0.0475111	5	1	2	2
group_8581	proteasome-type protease	Plant	2	8	1	62	10	0.0475111	3	3	2	2
group_11770	LysR family transcriptional regulator	Plant	2	8	1	62	10	0.0475111	5	1	2	2
group_7326	transglutaminase family protein	Plant	2	8	1	62	10	0.0475111	3	3	2	2

## Sheet: Tab. S10
Tab. S10. Distribution of Scoary-predicted specificity factors among Serratia marcescens assemblies. The assemblies are ordered according to the reference phylogeny based on core SNPs. Described are accession numbers of the assemblies, host (both species and assigned group, assemblies lacking annotations marked as ‘None’), isolation source and host disease, number of pangenomic clusters in the re…
Assembly	Host	Host_species	Isolation_source	Host_disease	Num_clusters	Num_clusters_Human	Num_clusters_Insect	Num_clusters_Plants	Percent_Human	Percent_Insect	Percent_Plant
GCF_015160915.1_ASM1516091v1	Insect	silkworm	blood from silkworm suffering from septicemia	None	4692	22	62	16	0.468883	1.3214	0.341006
GCF_013367735.1_ASM1336773v1	None	None	the rhizosphere soil of tea tree	None	4525	24	18	17	0.530387	0.39779	0.375691
GCF_003182655.1_ASM318265v1	None	not applicable	air	None	4742	31	5	3	0.653733	0.105441	0.0632644
GCF_003967055.1_ASM396705v1	None	None	None	None	4742	24	6	4	0.506116	0.126529	0.0843526
GCF_003355135.1_ASM335513v1	None	None	soil	None	4691	21	13	16	0.447666	0.277126	0.341079
GCF_009936295.1_ASM993629v1	None	None	None	None	4683	27	5	2	0.576553	0.106769	0.0427077
GCF_002220535.1_ASM222053v1	Human	Homo sapiens	University of Michigan Health System	bacteremia	4760	34	6	2	0.714286	0.12605	0.0420168
GCF_006974205.1_ASM697420v1	None	None	pond water	None	4120	18	3	1	0.436893	0.0728155	0.0242718
GCF_017301275.1_ASM1730127v1	None	None	None	None	4743	20	4	1	0.421674	0.0843348	0.0210837
GCF_017654245.1_ASM1765424v1	None	not collected	None	None	4708	21	4	1	0.446049	0.0849618	0.0212404
GCF_017299175.1_ASM1729917v1	None	None	None	None	4740	20	4	1	0.421941	0.0843882	0.021097
GCF_017299435.1_ASM1729943v1	None	None	None	None	4746	20	4	1	0.421408	0.0842815	0.0210704
GCF_013122155.1_ASM1312215v1	Insect	Drosophila melanogaster	None	None	4819	32	86	44	0.664038	1.7846	0.913053
GCF_001672055.1_ASM167205v1	Human	Homo sapiens	urine	In patient	4507	48	16	93	1.06501	0.355003	2.06346
GCF_001417865.2_ASM141786v2	Plant	Zea mays	None	None	5149	51	10	284	0.990484	0.194212	5.51563
GCF_013112395.1_ASM1311239v1	None	None	soil	None	4981	43	23	49	0.86328	0.461755	0.983738
GCF_011602465.1_ASM1160246v1	Plant	Jatropha curcas	seeds	None	4692	31	31	121	0.660699	0.660699	2.57886
GCF_013377375.1_ASM1337737v1	None	None	rhizosphere soil in ginger field	None	4727	25	34	63	0.528877	0.719272	1.33277
GCF_015708655.1_ASM1570865v1	Insect	Curculio caryae	pupal cells	None	4742	29	43	68	0.611556	0.90679	1.43399
GCF_000336425.1_ASM33642v1	None	None	None	None	4853	29	36	63	0.597569	0.741809	1.29817
GCF_000513215.1_DB11	None	None	None	None	4686	101	6	13	2.15536	0.128041	0.277422
GCF_011769885.1_ASM1176988v1	Human	Homo sapiens	sputum	None	4772	101	8	14	2.11651	0.167645	0.293378
GCF_006711145.1_ASM671114v1	Human	Homo sapiens	blood	opportunistic bacterial infectious disease	4683	135	5	3	2.88277	0.106769	0.0640615
GCF_002220595.1_ASM222059v1	Human	Homo sapiens	University of Michigan Health System	bacteremia	4780	144	6	3	3.01255	0.125523	0.0627615
GCF_002220615.1_ASM222061v1	Human	Homo sapiens	University of Michigan Health System	bacteremia	4678	110	43	3	2.35143	0.919196	0.06413
GCF_002220695.1_ASM222069v1	Human	Homo sapiens	University of Michigan Health System	bacteremia	4768	129	6	5	2.70554	0.125839	0.104866
GCF_002220575.1_ASM222057v1	Human	Homo sapiens	University of Michigan Health System	bacteremia	4770	129	6	5	2.7044	0.125786	0.104822
GCF_003071585.1_ASM307158v1	None	None	None	None	4745	119	3	31	2.5079	0.0632244	0.653319
GCF_002220675.1_ASM222067v1	Human	Homo sapiens	University of Michigan Health System	bacteremia	4788	120	0	29	2.50627	0	0.605681
GCF_002220515.1_ASM222051v1	Human	Homo sapiens	University of Michigan Health System	bacteremia	4888	180	1	33	3.68249	0.0204583	0.675123
GCF_002220715.1_ASM222071v1	Human	Homo sapiens	University of Michigan Health System	bacteremia	4871	167	46	31	3.42845	0.944365	0.63642
GCF_001280365.1_ASM128036v1	Plant	Solanum nigrum	None	None	4689	154	1	63	3.28428	0.0213265	1.34357
GCF_009909345.1_ASM990934v1	Human	Homo sapiens	sputum	None	5019	189	5	31	3.76569	0.0996214	0.617653
GCF_006711245.1_ASM671124v1	Human	Homo sapiens	blood	opportunistic bacterial infectious disease	4796	161	0	31	3.35696	0	0.646372
GCF_006716725.1_ASM671672v1	Human	Homo sapiens	blood	opportunistic bacterial infectious disease	4962	165	6	33	3.32527	0.120919	0.665054
GCF_008364265.2_ASM836426v2	None	None	Mixed salads	None	4584	81	12	7	1.76702	0.26178	0.152705
GCF_019344315.1_ASM1934431v1	None	None	water surface of oligotrophic pond	None	5084	136	53	7	2.67506	1.04249	0.137687
GCF_003186475.1_ASM318647v1	Human	Homo sapiens	wound	Missing	4727	101	6	1	2.13666	0.12693	0.0211551
GCF_003031645.1_ASM303164v1	Human	Homo sapiens	sputum	None	4987	132	4	4	2.64688	0.0802085	0.0802085
GCF_003031545.1_ASM303154v1	Human	Homo sapiens	sputum	None	5065	134	4	4	2.64561	0.0789733	0.0789733
GCF_904866365.1_MSB1_9C	None	None	None	None	5302	125	4	4	2.3576	0.0754432	0.0754432
GCF_008931425.1_ASM893142v1	None	None	Ensuite 7/8	None	5353	131	5	5	2.44723	0.0934056	0.0934056
GCF_003146705.1_ASM314670v1	Human	Homo sapiens	Peri-rectal	Not Applicable	5349	147	7	7	2.74818	0.130866	0.130866
GCF_001022215.1_ASM102221v1	Human	Homo sapiens	respiratory	None	5337	147	7	7	2.75436	0.13116	0.13116
GCF_006711525.1_ASM671152v1	Human	Homo sapiens	blood	opportunistic bacterial infectious disease	4544	187	13	8	4.11532	0.286092	0.176056
GCF_002220635.1_ASM222063v1	Human	Homo sapiens	University of Michigan Health System	bacteremia	5076	173	53	6	3.4082	1.04413	0.118203
GCF_009834305.1_ASM983430v1	Insect	Apis mellifera	None	None	4842	146	27	5	3.01528	0.557621	0.103263
GCF_013426155.1_ASM1342615v1	Human	Homo sapiens	platelet concentrate	septicemia	4985	179	11	5	3.59077	0.220662	0.100301
GCF_006842785.1_ASM684278v1	Human	Homo sapiens	blood	opportunistic bacterial infectious disease	4920	195	12	5	3.96341	0.243902	0.101626
GCF_006711125.1_ASM671112v1	Human	Homo sapiens	blood	opportunistic bacterial infectious disease	4920	195	12	5	3.96341	0.243902	0.101626
GCF_006716825.1_ASM671682v1	Human	Homo sapiens	blood	opportunistic bacterial infectious disease	4943	196	12	5	3.9652	0.242768	0.101153
GCF_006711405.1_ASM671140v1	Human	Homo sapiens	blood	opportunistic bacterial infectious disease	4944	196	12	5	3.9644	0.242718	0.101133
GCF_000783915.2_ASM78391v2	Human	Homo sapiens	endotracheal aspirate	Cough	4773	183	2	1	3.83407	0.0419024	0.0209512
GCF_009909365.1_ASM990936v1	Human	Homo sapiens	blood	None	5105	204	0	0	3.99608	0	0
GCF_009909385.1_ASM990938v1	Human	Homo sapiens	body fluid	None	5103	205	0	0	4.01724	0	0
GCF_009909425.1_ASM990942v1	Human	Homo sapiens	sputum	None	5102	205	0	0	4.01803	0	0
GCF_009909405.1_ASM990940v1	Human	Homo sapiens	body fluid	None	5092	205	0	0	4.02592	0	0
GCF_015074945.1_ASM1507494v1	Human	Homo sapiens	Greece	n/a	4972	147	2	1	2.95656	0.0402253	0.0201126
GCF_000828775.1_ASM82877v1	None	None	None	None	4910	100	0	0	2.03666	0	0
GCF_013426135.1_ASM1342613v1	Human	Homo sapiens	platelet concentrate	septicemia	5245	101	2	13	1.92564	0.0381316	0.247855
GCF_002947235.1_ASM294723v1	None	None	None	None	5018	99	2	13	1.9729	0.0398565	0.259067
GCF_900029885.1_Sm_SMB2099	None	None	None	None	4651	96	0	2	2.06407	0	0.0430015
GCF_001294565.1_ASM129456v1	Human	Homo sapiens	bronchial sample from a male patient with chronic obstructive pneumonia	Chronic obstructive pneumonia	4832	112	2	1	2.31788	0.0413907	0.0206954
GCF_002996885.1_ASM299688v1	None	None	None	None	4913	93	2	2	1.89294	0.0407083	0.0407083
GCF_002220555.1_ASM222055v1	Human	Homo sapiens	University of Michigan Health System	bacteremia	4572	106	0	5	2.31846	0	0.109361
GCF_002220655.1_ASM222065v1	Human	Homo sapiens	University of Michigan Health System	bacteremia	4920	117	0	2	2.37805	0	0.0406504
GCF_009858195.1_ASM985819v1	Human	Homo sapiens	None	None	4678	119	0	1	2.54382	0	0.0213767
GCF_003071565.1_ASM307156v1	None	None	None	None	4752	79	0	1	1.66246	0	0.0210438
GCF_002997125.1_ASM299712v1	None	None	None	None	4865	86	0	1	1.76773	0	0.020555
GCF_003071625.1_ASM307162v1	None	None	None	None	4699	84	0	1	1.78761	0	0.0212811
GCF_003204405.1_ASM320440v1	None	None	None	None	4699	84	0	1	1.78761	0	0.0212811
GCF_003204075.1_ASM320407v1	None	None	None	None	4699	84	0	1	1.78761	0	0.0212811
GCF_003071605.1_ASM307160v1	None	None	None	None	4697	84	0	1	1.78838	0	0.0212902

[truncated: 8 more sheets: Tab. S11, Tab. S12, Tab. S13, Tab. S14, Tab. S15, Tab. S16, Tab. S17, Tab. S18]
